# Supplementary material for: MazF activation promotes translational heterogeneity of the grcA mRNA in Escherichia coli populations
Source: PeerJ. 2017 Sep 21;5:e3830. doi: 10.7717/peerj.3830 (PMC5610899; doi:10.7717/peerj.3830)
Supplement: File S1 — Datasets: source data, statistical tests, sequences, primers, R commands. [file peerj-05-3830-s003.xlsx]

## Sheet: Fig 1B
	mean GFP fluorescence	mean log GFP fluorescence	median log GFP fluorescence		average values	NN227	MEAN.GFP	MEAN.log.GFP	MEDIAN.log.GFP
SAMPLE.ID	MEAN.GFP	MEAN.log.GFP	MEDIAN.log.GFP	dataset 141112	analyzed 10,000 of total 150,000 cells	early exponential phase	6.83291	0.747804	0.801564
227_exp_1.fcs	6.8669	0.749721	0.805474			control, after 2h	5.52413	0.644952	0.696644
227_exp_2.fcs	6.78521	0.744674	0.793744			SHX-treated, after 2h	5.27078	0.618307	0.675138
227_exp_3.fcs	6.84664	0.749016	0.805474			control, after 5.5h	4.24572	0.515866	0.550016
227_t1_0n_1.fcs	5.28421	0.622687	0.672532			SHX-treated, after 5.5h	4.59441	0.554121	0.595634
227_t1_0n_2.fcs	5.73252	0.66527	0.717498			1.5h re-growth, after 3.5h SHX-treatment	4.79537	0.578613	0.624308
227_t1_0n_3.fcs	5.55566	0.646901	0.699902			control, after 22h	6.34128	0.704527	0.763767
227_t1_H_1.fcs	5.31597	0.620816	0.680352			17h re-growth, after 3.5h SHX-treatment	5.42244	0.629772	0.679049
227_t1_H_2.fcs	5.3196	0.624333	0.680352
227_t1_H_3.fcs	5.17678	0.609772	0.664712
227_t2_0n_1.fcs	4.2228	0.512683	0.55132			NN229	MEAN.GFP	MEAN.log.GFP	MEDIAN.log.GFP
227_t2_0n_2.fcs	4.31216	0.521938	0.55523			early exponential phase	10.8493	0.980902	1.01792
227_t2_0n_3.fcs	4.20221	0.512977	0.5435			control, after 2h	9.31932	0.906489	0.95145
227_t2_H_1.fcs	4.6868	0.56373	0.606061			SHX-treated, after 2h	11.6538	1.0141	1.04659
227_t2_H_2.fcs	4.4486	0.538939	0.57869			control, after 5.5h	10.8531	0.97948	1.01792
227_t2_H_3.fcs	4.64781	0.559694	0.602151			SHX-treated, after 5.5h	10.1171	0.943676	0.985989
227_t2_W_1.fcs	5.04818	0.604538	0.652981			1.5h re-growth, after 3.5h SHX-treatment	9.77637	0.930685	0.972304
227_t2_W_2.fcs	4.48356	0.547369	0.59042			control, after 22h	25.1663	1.37503	1.39589
227_t2_W_3.fcs	4.85437	0.583932	0.629521			17h re-growth, after 3.5h SHX-treatment	25.5443	1.38428	1.40111
227_t3_0n_1.fcs	6.41636	0.711237	0.770283
227_t3_0n_2.fcs	6.36964	0.706053	0.766373			percentage increase in the GFP signal of NN229 in comparison to NN227
227_t3_0n_3.fcs	6.23782	0.696291	0.754643			calculated as (ΔmazF-wt)/wt, i.e. (NN229-NN227)/NN227
227_t3_W_1.fcs	5.78007	0.664474	0.715543				MEAN.GFP
227_t3_W_2.fcs	5.19118	0.606939	0.652981			early exponential phase	58.7796	%
227_t3_W_3.fcs	5.29608	0.617905	0.668622			control, after 2h	68.7021	%
229_exp_1.fcs	10.6927	0.973725	1.01271			SHX-treated, after 2h	121.102	%
229_exp_2.fcs	10.8545	0.9806	1.01662			control, after 5.5h	155.624	%
229_exp_3.fcs	11.0006	0.988382	1.02444			SHX-treated, after 5.5h	120.204	%
229_t1_0n_1.fcs	9.31414	0.905863	0.950147			1.5h re-growth, after 3.5h SHX-treatment	103.871	%
229_t1_0n_2.fcs	9.27333	0.904478	0.950147			control, after 22h	296.865	%
229_t1_0n_3.fcs	9.37051	0.909128	0.954057			17h re-growth, after 3.5h SHX-treatment	371.085	%
229_t1_H_1.fcs	11.4753	1.00594	1.04008
229_t1_H_2.fcs	11.5846	1.01121	1.04399
229_t1_H_3.fcs	11.9015	1.02516	1.05572
229_t2_0n_1.fcs	11.0934	0.990011	1.02835
229_t2_0n_2.fcs	10.6133	0.96817	1.0088			Early exponential phase	average log GFP expression (mean ± standard error of the mean)
229_t2_0n_3.fcs	10.8526	0.980261	1.01662			NN227	0.748 ± 0.001
229_t2_H_1.fcs	10.3963	0.955596	0.999022			NN229	0.981 ± 0.003
229_t2_H_2.fcs	10.3676	0.956126	0.997067			MG1655	0.785 ± 0.002
229_t2_H_3.fcs	9.58739	0.919307	0.961877
229_t2_W_1.fcs	9.9136	0.938917	0.981427
229_t2_W_2.fcs	9.70753	0.925407	0.965787
229_t2_W_3.fcs	9.70797	0.927731	0.969697
229_t3_0n_1.fcs	24.8042	1.3646	1.39198
229_t3_0n_2.fcs	25.9438	1.39055	1.40762
229_t3_0n_3.fcs	24.7509	1.36993	1.38807
229_t3_W_1.fcs	25.8717	1.38781	1.40762
229_t3_W_2.fcs	24.6631	1.36999	1.38416
229_t3_W_3.fcs	26.0981	1.39505	1.41153
MG_exp_1.fcs	7.44166	0.787841	0.840665
MG_exp_2.fcs	7.36553	0.783003	0.836755
MG_t1_0n_1.fcs	5.14977	0.613286	0.660802
MG_t1_0n_2.fcs	5.28587	0.626322	0.676442
MG_t1_H_1.fcs	4.59242	0.550858	0.59042
MG_t1_H_2.fcs	4.57367	0.550923	0.59042
MG_t2_0n_1.fcs	3.24981	0.39705	0.394917
MG_t2_0n_2.fcs	3.36602	0.410603	0.410557
MG_t2_H_1.fcs	3.91453	0.476848	0.500489
MG_t2_H_2.fcs	4.5936	0.554624	0.59433
MG_t2_W_1.fcs	4.42881	0.542516	0.5826
MG_t2_W_2.fcs	4.64063	0.562203	0.606061
MG_t3_0n_1.fcs	4.71011	0.541759	0.56696
MG_t3_0n_2.fcs	4.19077	0.50506	0.531769
MG_t3_W_1.fcs	4.16074	0.508792	0.539589
MG_t3_W_2.fcs	4.11686	0.509168	0.539589
0n - controls
H - under stress
W - cultures initially stressed, but then washed and allowed for recovery
strains:
"MG" - MG1655
"227" - NN227
"229" - NN229
measured in the exponential phase, and time points t1, t2 and t3

## Sheet: Fig 2AB Table 1
harsh stress	percentage of GFP+ cells	percentage of mCherry+ cells	percentage of GFP+ and mCherry+ cells	mean log GFP fluorescence	mean log mCherry fluorescence	correlation between GFP and mCherry signals		mean log mCherry fluorescence	CV of log mCherry fluorescence	SCV of log mCherry fluorescence	dataset 150331				p-values
	gated dataset	gated dataset	gated dataset	gated dataset	gated dataset	gated dataset	gated dataset	entire dataset	entire dataset	entire dataset					pairwise comparisons: TB212 (no gfp reporter) vs NN230 (gfp reporter)
SAMPLE.ID	GFP%above	mCherry%above	all%above	MEAN.log.GFP	MEAN.log.mCherry	rho.mCherry.GFP	p.value.mCherry.GFP	MEAN.log.mCherry	CV.log.mCherry	SCV.log.mCherry					t-test per each measurement
0331_230_exp_1_001.fcs	0.944009	81.8541	0.784177	1.4899	2.11839	0.0465009	4.62e-11	2.12628	0.123082	0.0151491					mCherry%above	all%above	MEAN.log.GFP	MEAN.log.mCherry
0331_230_exp_2_002.fcs	1.74369	92.3607	1.66875	1.53262	2.22214	0.0751799	1.74e-26	2.20116	0.114181	0.0130373
0331_230_exp_3_003.fcs	2.3825	86.1396	2.15274	1.55719	2.16027	0.0625682	7.91e-19	2.14476	0.117638	0.0138387					mCherry+	mCherry+ GFP+	mean log GFP fluorescence	mean log mCherry fluorescence
0331_230_t1_Amp_1_043.fcs	0.423771	4.89082	0.0249277	1.49032	1.58678	0.00396466	0.574479	1.62254	0.193666	0.0375065		time point t1	control	control	0.818992	0.885214	0.605755	0.902533
0331_230_t1_Amp_2_044.fcs	0.419832	3.7535	0.009996	1.50843	1.59132	0.00538416	0.446331	1.61723	0.177333	0.031447			stress	Amp	0.95626	0.466423	0.0546601	0.0927527
0331_230_t1_Amp_3_045.fcs	0.254771	3.34199	0.0049955	1.50131	1.58467	0.0011435	0.87148	1.62535	0.170637	0.0291169				Cam	0.928934	0.870142	0.596813	0.737035
0331_230_t1_chl_1_015.fcs	1.46237	99.8403	1.41745	1.54995	2.52357	0.0304182	1.66e-05	2.52054	0.11192	0.012526				NA	0.572322	0.741008	0.655392	0.0796698
0331_230_t1_chl_2_016.fcs	4.34957	99.0701	4.32957	1.61617	2.43938	0.0734619	2.4e-25	2.33603	0.142501	0.0203066				SHX	0.383028	0.370368	0.132431	0.662475
0331_230_t1_chl_3_017.fcs	4.45844	99.0953	4.42845	1.62002	2.44915	0.0647665	4.73e-20	2.48777	0.141623	0.0200571				Spec	0.254772	0.128324	0.0418712	0.567633
0331_230_t1_n_1_008.fcs	4.0975	99.8903	4.09252	1.59833	2.43613	0.0944019	6.06e-41	2.4068	0.10417	0.0108513
0331_230_t1_n_2_009.fcs	2.46569	58.0185	1.61717	1.59089	1.99117	0.050718	6.82e-13	1.99529	0.125304	0.0157011		time point t2	control	control	0.186959	0.0306615	0.122711	0.109351
0331_230_t1_n_3_010.fcs	3.39042	62.8302	2.42173	1.60328	2.02267	0.077086	8.8e-28	2.10372	0.142371	0.0202695			stress	Amp	0.794721	0.900641	0.095624	0.768983
0331_230_t1_NA_1_022.fcs	37.2738	99.7806	37.2339	1.77675	2.88141	0.114921	6.18e-60	2.85081	0.138615	0.0192142				Cam	0.859038	0.464052	0.568883	0.413486
0331_230_t1_NA_2_023.fcs	17.1662	99.5262	17.0964	1.69138	2.902	0.136605	4.02e-84	2.85929	0.15112	0.0228372				NA	0.519487	0.378083	0.294004	0.0654577
0331_230_t1_NA_3_024.fcs	17.7128	98.099	17.5581	1.69255	2.85579	0.154399	3.69e-107	2.77643	0.199474	0.0397898				SHX	0.41717	0.0482427	0.0093572	0.437217
0331_230_t1_SHX_1_036.fcs	4.80415	98.8438	4.74933	1.61737	2.40336	0.0597764	2.36e-17	2.3963	0.112772	0.0127175				Spec	0.538359	0.0524499	0.0240686	0.232164
0331_230_t1_SHX_2_037.fcs	2.89819	85.948	2.59889	1.604	2.16615	0.0672244	1.6e-21	2.14198	0.132705	0.0176105			recovery	w_Amp	0.13929	0.263034	0.0509075	0.105621
0331_230_t1_SHX_3_038.fcs	3.60446	74.6738	2.83957	1.61543	2.09155	0.0653778	2.13e-20	2.14094	0.12938	0.0167393				w_Cam	0.340525	0.414326	0.371243	0.366652
0331_230_t1_spec_1_029.fcs	2.99512	97.1444	2.92535	1.59235	2.31576	0.0279925	7.32e-05	2.36073	0.106041	0.0112447				w_NA	0.654887	0.185633	0.156239	0.619025
0331_230_t1_spec_2_030.fcs	1.8803	98.7531	1.87032	1.58808	2.42246	0.0381469	6.55e-08	2.42129	0.105851	0.0112043				w_SHX	0.518465	0.00823356	0.0258529	0.535989
0331_230_t1_spec_3_034.fcs	1.53148	97.4159	1.50653	1.57962	2.34221	0.0477977	1.28e-11	2.4743	0.141699	0.0200787				w_Spec	0.382415	0.374362	0.109546	0.372818
0331_230_t2_Amp_1_085.fcs	0.29381	5.23878	0.0149395	1.48376	1.62251	0.000850597	0.904065	1.63863	0.168219	0.0282975
0331_230_t2_Amp_2_086.fcs	0.263879	5.32736	0.0248942	1.4825	1.62576	-0.0127022	0.0718393	1.64078	0.165302	0.0273249		time point t3	control	control	0.732515	0.000414223	0.000717839	0.89458
0331_230_t2_Amp_3_087.fcs	0.344432	6.80377	0.0249588	1.48888	1.64735	0.00227398	0.747578	1.68501	0.154454	0.0238561			recovery	w_Amp	0.836366	0.0371894	0.00838649	0.826012
0331_230_t2_chl_1_057.fcs	1.94815	98.5913	1.91318	1.57983	2.41687	0.0510415	4.97e-13	2.33525	0.168595	0.0284244				w_Cam	0.447911	0.00383434	0.00220466	0.327626
0331_230_t2_chl_2_058.fcs	2.37028	99.5319	2.3653	1.59023	2.49775	0.0721006	1.45e-24	2.50012	0.115415	0.0133206				w_NA	0.0347626	0.102154	0.0652337	0.206753
0331_230_t2_chl_3_059.fcs	2.22322	98.3363	2.19824	1.58523	2.47087	0.064337	8.15e-20	2.57347	0.162593	0.0264366				w_SHX	0.434366	0.00813629	0.000207668	0.097051
0331_230_t2_n_1_050.fcs	1.02933	44.2762	0.529656	1.51422	1.9193	0.041588	3.97e-09	1.86952	0.13416	0.017999				w_Spec	0.666707	0.0325966	0.00786903	0.986958
0331_230_t2_n_2_051.fcs	1.39382	30.0095	0.52955	1.54216	1.84107	0.0411796	5.6e-09	1.79373	0.137214	0.0188276
0331_230_t2_n_3_052.fcs	1.87463	30.4189	0.794841	1.55429	1.84743	0.0499954	1.49e-12	1.87853	0.1619	0.0262116								differences in mCherry fluorescence should
0331_230_t2_NA_1_064.fcs	17.8557	98.4556	17.766	1.69446	2.99757	0.184116	1.54e-152	2.82699	0.221462	0.0490453								not be significant because
0331_230_t2_NA_2_065.fcs	12.295	99.5315	12.1555	1.67158	3.00703	0.151875	7.96e-104	2.89902	0.167842	0.0281709								they were measured in identical conditions
0331_230_t2_NA_3_066.fcs	14.1368	99.4814	14.087	1.67742	3.03628	0.166558	1.07e-124	3.09195	0.130989	0.0171581
0331_230_t2_SHX_1_078.fcs	1.7443	99.5752	1.7393	1.57277	2.46035	0.0450555	1.82e-10	2.37018	0.120437	0.014505
0331_230_t2_SHX_2_079.fcs	1.86748	47.1064	0.933739	1.57296	1.94248	0.0402869	1.18e-08	1.90723	0.135429	0.0183409
0331_230_t2_SHX_3_080.fcs	2.59844	52.5435	1.45413	1.59174	2.008	0.0451549	1.65e-10	2.02725	0.174436	0.0304278
0331_230_t2_spec_1_071.fcs	4.36128	98.7176	4.31637	1.61804	2.49539	0.0729475	4.66e-25	2.48926	0.112551	0.0126678
0331_230_t2_spec_2_072.fcs	2.60206	99.4417	2.57714	1.59415	2.53512	0.0464812	4.5e-11	2.57549	0.0802905	0.00644656
0331_230_t2_spec_3_073.fcs	2.66281	99.4864	2.65782	1.59383	2.50476	0.0653573	1.96e-20	2.67384	0.118282	0.0139907
0331_230_t2_w_Amp_1_120.fcs	0.714143	2.19237	0.014982	1.51676	1.57114	0.0032672	0.643865	1.59846	0.177356	0.031455
0331_230_t2_w_Amp_2_121.fcs	0.930071	2.83	0.0497364	1.5096	1.582	0.0190956	0.006774	1.6109	0.177931	0.0316594
0331_230_t2_w_Amp_3_122.fcs	0.644774	2.44914	0.019993	1.50218	1.57421	0.0132793	0.0603451	1.60902	0.164352	0.0270117
0331_230_t2_w_chl_1_092.fcs	18.8036	91.5304	17.5324	1.69224	2.21423	-0.00267537	0.704763	2.19902	0.113605	0.012906
0331_230_t2_w_chl_2_093.fcs	2.40868	49.098	1.34426	1.57933	1.94678	0.0320227	5.88e-06	1.99912	0.118224	0.0139769
0331_230_t2_w_chl_3_094.fcs	3.76859	47.1548	1.97664	1.59868	1.93689	0.0436108	6.6e-10	2.01552	0.13244	0.0175404
0331_230_t2_w_NA_1_099.fcs	18.7222	98.9468	18.6124	1.68876	3.01059	0.162547	1.14e-118	2.94706	0.18954	0.0359255
0331_230_t2_w_NA_2_100.fcs	17.8691	96.7202	17.4791	1.6871	2.87822	0.123733	4.53e-69	2.80569	0.190484	0.036284
0331_230_t2_w_NA_3_101.fcs	29.2904	92.1816	28.7871	1.74052	2.89159	0.331215	0	2.94285	0.189234	0.0358097
0331_230_t2_w_SHX_1_113.fcs	2.24365	37.0078	0.929442	1.58113	1.89244	0.0358293	3.98e-07	1.85172	0.124366	0.0154668
0331_230_t2_w_SHX_2_114.fcs	3.693	20.0399	0.837279	1.60389	1.79355	0.014878	0.0350765	1.77261	0.126885	0.0160998
0331_230_t2_w_SHX_3_115.fcs	2.95923	19.5619	0.703628	1.5871	1.7876	0.0348877	7.82e-07	1.78024	0.134317	0.018041
0331_230_t2_w_spec_1_10.fcs	4.28621	82.3612	3.74233	1.60752	2.13709	0.0491569	3.34e-12	2.13208	0.113379	0.0128548
0331_230_t2_w_spec_2_10.fcs	1.333	16.9446	0.284573	1.55401	1.77498	0.0244906	0.000527492	1.78116	0.130108	0.0169282
0331_230_t2_w_spec_3_10.fcs	1.22067	18.1157	0.283992	1.55283	1.77692	0.0313702	8.79e-06	1.83209	0.146552	0.0214775
0331_230_t3_n_1_001.fcs	1.37068	99.7558	1.37068	1.55877	2.59221	0.0538297	2.35e-14	2.65498	0.0840294	0.00706094
0331_230_t3_n_2_002.fcs	1.44516	99.9801	1.44516	1.57038	2.63485	0.044908	1.96e-10	2.68357	0.0803045	0.00644882
0331_230_t3_n_3_003.fcs	1.34278	99.98	1.34278	1.56254	2.64914	0.0570556	6.39e-16	2.74185	0.0952075	0.00906447
0331_230_t3_w_Amp_1_036.fcs	3.22645	77.5844	2.78761	1.60223	2.09431	0.0931692	6.59e-40	2.05739	0.116186	0.0134991
0331_230_t3_w_Amp_2_037.fcs	1.93133	81.4602	1.62691	1.57529	2.11194	0.0584999	1.16e-16	2.14801	0.103325	0.0106761
0331_230_t3_w_Amp_3_038.fcs	3.48524	85.1915	3.15118	1.6022	2.14064	0.0666224	3.56e-21	2.11898	0.11242	0.0126382
0331_230_t3_w_chl_1_008.fcs	6.55525	99.98	6.54527	1.63729	2.88258	0.136324	9.34e-84	2.81124	0.100255	0.0100511
0331_230_t3_w_chl_2_009.fcs	5.0812	99.2926	5.06127	1.6135	2.92125	0.155855	2.38e-109	2.88413	0.102456	0.0104971
0331_230_t3_w_chl_3_010.fcs	6.40092	98.9773	6.37597	1.6312	2.3751	0.0880563	8.44e-36	2.43943	0.116008	0.0134579
0331_230_t3_w_NA_1_015.fcs	6.05215	90.5728	5.63338	1.63357	2.20823	0.0829845	5.4e-32	2.15209	0.136633	0.0186685
0331_230_t3_w_NA_2_016.fcs	4.28771	84.5313	3.63881	1.61186	2.13784	0.0508815	5.76e-13	2.12664	0.132624	0.0175891
0331_230_t3_w_NA_3_017.fcs	2.52874	99.6852	2.49375	1.58635	2.58069	0.0620162	1.63e-18	2.66742	0.118186	0.013968
0331_230_t3_w_SHX_1_029.fcs	4.64133	100	4.64133	1.61881	2.9441	0.122474	4.95e-68	2.87232	0.095513	0.00912272
0331_230_t3_w_SHX_2_030.fcs	4.07256	100	4.07256	1.61695	2.96152	0.0810654	1.55e-30	2.87998	0.107121	0.0114749
0331_230_t3_w_SHX_3_031.fcs	5.47631	97.8354	5.4414	1.62722	2.83723	0.149576	1.18e-100	2.85308	0.152848	0.0233626
0331_230_t3_w_spec_1_02.fcs	4.66637	99.9651	4.66637	1.61995	2.74231	0.0951627	1.56e-41	2.73755	0.0908166	0.00824765
0331_230_t3_w_spec_2_02.fcs	8.21863	99.7905	8.21364	1.65628	2.67139	0.103138	1.49e-48	2.62674	0.0862684	0.00744224
0331_230_t3_w_spec_3_02.fcs	7.81242	99.985	7.80743	1.65213	2.6855	0.111227	3.34e-56	2.70171	0.107146	0.0114802
0331_MG_exp_007.fcs	3.64336	1.49433	0.079964	1.58532	1.50045	-0.00100192	0.887304	1.49962	0.196278	0.0385249
0331_MG_t1_Amp_049.fcs	0.467755	1.53264	0.00497611	1.51462	1.54273	0.00445442	0.527763	1.55091	0.169806	0.0288339
0331_MG_t1_chl_021.fcs	2.12766	1.63934	0.0398625	1.59177	1.55412	-0.00184636	0.793669	1.558	0.165957	0.0275418
0331_MG_t1_n_014.fcs	4.07786	1.6571	0.0698777	1.61415	1.54539	0.0021237	0.763734	1.54613	0.171523	0.0294202
0331_MG_t1_NA_028.fcs	22.5995	9.9312	2.36315	1.71499	1.70886	0.0118433	0.0934878	1.70884	0.139125	0.0193557
0331_MG_t1_SHX_042.fcs	2.18365	1.96478	0.0497413	1.59551	1.58045	0.0178854	0.0112128	1.58484	0.150174	0.0225523
0331_MG_t1_spec_035.fcs	2.4079	2.55746	0.0398823	1.60083	1.60324	0.000473072	0.946584	1.60045	0.150186	0.0225558
0331_MG_t2_Amp_091.fcs	0.483284	1.8584	0.00996463	1.50269	1.5554	0.0088471	0.210084	1.55919	0.168734	0.0284712
0331_MG_t2_chl_063.fcs	1.35668	1.91531	0.0249389	1.56732	1.57814	0.00529049	0.453819	1.58319	0.152649	0.0233019
0331_MG_t2_n_056.fcs	0.254009	1.50911	0	1.4524	1.53347	0.00129944	0.853923	1.5261	0.182331	0.0332445
0331_MG_t2_NA_070.fcs	11.5534	2.175	0.249426	1.66126	1.59395	-0.00287712	0.683766	1.59553	0.14366	0.0206382
0331_MG_t2_SHX_084.fcs	0.538922	1.94112	0.0149701	1.53254	1.58062	0.00534809	0.449021	1.57869	0.149545	0.0223638
0331_MG_t2_spec_077.fcs	0.808061	2.06504	0.0199521	1.55497	1.58861	-0.00741925	0.293512	1.58993	0.147013	0.021613
0331_MG_t2_w_Amp_126.fcs	1.09462	2.2892	0.0249913	1.52827	1.57658	0.00880316	0.213088	1.58705	0.161922	0.0262187
0331_MG_t2_w_chl_098.fcs	3.96794	2.08603	0.0746789	1.59986	1.59685	0.00902583	0.20085	1.59755	0.143731	0.0206585
0331_MG_t2_w_NA_105.fcs	19.9221	2.13594	0.439166	1.69347	1.60818	0.0131227	0.063233	1.61033	0.139372	0.0194245
0331_MG_t2_w_SHX_119.fcs	0.758218	2.03522	0.00997656	1.54271	1.58933	0.0162673	0.0212648	1.58724	0.148804	0.0221426
0331_MG_t2_w_spec_112.fcs	0.534626	2.04357	0.009993	1.51951	1.58452	0.00219238	0.756456	1.58426	0.15118	0.0228553
0331_MG_t3_n_007.fcs	0.234356	1.99452	0.00498629	1.50663	1.58126	0.0107551	0.127747	1.58324	0.151852	0.0230589
0331_MG_t3_w_Amp_042.fcs	1.25393	2.21312	0.0349703	1.56314	1.59349	0.0183882	0.00927774	1.59012	0.145768	0.0212482
0331_MG_t3_w_chl_014.fcs	1.36577	1.46546	0.0299073	1.54577	1.54747	0.00444067	0.529387	1.54744	0.167455	0.0280412
0331_MG_t3_w_NA_021.fcs	1.74766	1.71779	0.0398327	1.56845	1.56364	0.0068568	0.331209	1.56577	0.161827	0.0261879
0331_MG_t3_w_SHX_035.fcs	0.677392	1.95248	0.00996165	1.54263	1.59656	0.00695898	0.324137	1.59317	0.142821	0.0203979
0331_MG_t3_w_spec_028.fcs	0.479497	2.34754	0.019979	1.54458	1.57914	0.00751189	0.287851	1.57922	0.157012	0.0246529
0331_TB_exp_1_004.fcs	1.49187	91.6924	1.41702	1.52152	2.20696	0.0643612	7.48e-20	2.18277	0.116616	0.0135992
0331_TB_exp_2_005.fcs	2.49451	92.5215	2.37478	1.55358	2.21267	0.0627527	5.97e-19	2.17106	0.118404	0.0140195
0331_TB_exp_3_006.fcs	4.45961	87.5131	3.99123	1.59585	2.16339	0.0704507	1.65e-23	2.15757	0.110652	0.0122438
0331_TB_t1_Amp_1_046.fcs	0.37962	3.51648	0.014985	1.51723	1.5982	0.0131307	0.0631904	1.62716	0.174044	0.0302915
0331_TB_t1_Amp_2_047.fcs	0.409182	3.81238	0.00998004	1.5129	1.60339	0.00969111	0.170111	1.62951	0.169662	0.0287851
0331_TB_t1_Amp_3_048.fcs	0.469226	4.76214	0.0499176	1.52394	1.6211	0.0104366	0.139641	1.6491	0.163764	0.0268186
0331_TB_t1_chl_1_018.fcs	3.15396	99.4868	3.144	1.60415	2.46404	0.0610543	4.84e-18	2.46631	0.140804	0.0198258
0331_TB_t1_chl_2_019.fcs	3.46983	99.255	3.45983	1.60615	2.44902	0.0506636	7.54e-13	2.49614	0.136462	0.0186219
0331_TB_t1_chl_3_020.fcs	4.13883	99.3418	4.13384	1.61867	2.46794	0.0649438	3.39e-20	2.47437	0.128085	0.0164059
0331_TB_t1_n_1_011.fcs	4.0084	82.3021	3.56857	1.60765	2.15106	0.0862941	2.19e-34	2.20248	0.135459	0.0183491
0331_TB_t1_n_2_012.fcs	3.63582	89.3622	3.38111	1.60479	2.22447	0.0690708	1.31e-22	2.29915	0.121357	0.0147276
0331_TB_t1_n_3_013.fcs	2.49054	60.7641	1.62383	1.59079	2.01151	0.0669881	2.07e-21	2.03984	0.13952	0.0194657
0331_TB_t1_NA_1_025.fcs	26.9889	99.1421	26.8293	1.73492	2.92255	0.182714	4.78e-150	2.90296	0.152102	0.0231351
0331_TB_t1_NA_2_026.fcs	25.0125	98.5084	24.8079	1.72769	2.91772	0.156207	1.08e-109	2.89758	0.152096	0.0231332
0331_TB_t1_NA_3_027.fcs	28.0236	98.6767	27.8338	1.7423	2.92728	0.19132	2.12e-164	2.91245	0.152695	0.0233159
0331_TB_t1_SHX_1_039.fcs	2.48851	98.1361	2.45353	1.59903	2.35671	0.0396263	2.05e-08	2.40304	0.105436	0.0111168
0331_TB_t1_SHX_2_040.fcs	2.60991	93.5027	2.48016	1.60309	2.23993	0.0451764	1.57e-10	2.27908	0.105617	0.0111549
0331_TB_t1_SHX_3_041.fcs	3.13872	91.1477	2.91417	1.60575	2.21535	0.0561932	1.71e-15	2.27473	0.118205	0.0139724
0331_TB_t1_spec_1_032.fcs	0.907143	96.3964	0.89219	1.55989	2.34494	0.0179657	0.0109345	2.40657	0.125411	0.015728
0331_TB_t1_spec_2_033.fcs	1.19065	97.8877	1.17571	1.5739	2.37449	0.0350614	6.74e-07	2.41822	0.12555	0.0157627
0331_TBreal_t1_spec_3_0.fcs	1.14271	94.9351	1.0978	1.5732	2.28239	0.0305008	1.57e-05	2.35532	0.131054	0.0171752
0331_TB_t2_Amp_1_088.fcs	0.439209	7.68117	0.0449191	1.49519	1.65683	-0.0160273	0.0232896	1.68488	0.156732	0.0245648
0331_TB_t2_Amp_2_089.fcs	0.368857	5.25371	0.0199382	1.49009	1.6264	0.00714087	0.311832	1.65271	0.16016	0.0256514
0331_TB_t2_Amp_3_090.fcs	0.304027	5.24322	0.00498405	1.48834	1.62473	0.00416858	0.554899	1.65166	0.161964	0.0262325
0331_TB_t2_chl_1_060.fcs	2.1712	98.5226	2.12628	1.58503	2.49078	0.0650032	3.26e-20	2.45808	0.171208	0.0293123
0331_TB_t2_chl_2_061.fcs	2.19956	98.9052	2.18456	1.58717	2.50729	0.0639634	1.36e-19	2.50796	0.1577	0.0248692
0331_TB_t2_chl_3_062.fcs	1.64311	99.2758	1.62313	1.57312	2.46379	0.0594387	3.84e-17	2.50292	0.171952	0.0295676
0331_TB_t2_n_1_053.fcs	0.479066	46.14	0.299416	1.50726	1.93741	0.028565	5.25e-05	1.9461	0.15365	0.0236084
0331_TB_t2_n_2_054.fcs	0.659308	37.0811	0.239748	1.51808	1.90074	0.0245614	0.000509651	1.90098	0.16367	0.0267878
0331_TB_t2_n_3_055.fcs	0.294338	56.0439	0.149663	1.49961	1.98439	0.0368134	1.85e-07	1.95899	0.146177	0.0213676
0331_TB_t2_NA_1_067.fcs	16.0567	99.0414	15.9469	1.6875	3.03857	0.150462	9.76e-102	3.07255	0.130142	0.0169368
0331_TB_t2_NA_2_068.fcs	14.8815	99.4812	14.8416	1.68456	3.04717	0.161001	1.73e-116	3.08389	0.127339	0.0162153
0331_TB_t2_NA_3_069.fcs	20.2883	97.3162	19.9292	1.70688	3.07015	0.18896	1.66e-160	3.05448	0.148718	0.0221169
0331_TB_t2_SHX_1_081.fcs	0.533959	49.1042	0.304406	1.52673	1.97445	0.0220146	0.00182978	1.95421	0.15938	0.0254021
0331_TB_t2_SHX_2_082.fcs	0.673585	46.7618	0.389183	1.53485	1.94933	0.0282347	6.4e-05	1.95219	0.150943	0.0227839
0331_TB_t2_SHX_3_083.fcs	0.617499	52.6518	0.398387	1.5325	2.01638	0.026802	0.000145577	2.01116	0.170579	0.0290972
0331_TB_t2_spec_1_074.fcs	0.841717	98.5457	0.811834	1.55247	2.5217	0.0295402	2.83e-05	2.61969	0.119316	0.0142362
0331_TB_t2_spec_2_075.fcs	0.938217	98.7673	0.918255	1.5555	2.53763	0.0331177	2.75e-06	2.63903	0.10094	0.0101889
0331_TB_t2_spec_3_076.fcs	0.76313	99.5411	0.758143	1.55176	2.53594	0.0225308	0.00142052	2.62803	0.106638	0.0113718
0331_TB_t2_w_Amp_1_123.fcs	0.514588	2.26819	0.00999201	1.49196	1.56995	0.000616192	0.930535	1.59609	0.16678	0.0278157
0331_TB_t2_w_Amp_2_124.fcs	0.508069	1.89779	0.00498107	1.49262	1.56573	-0.00142652	0.83983	1.60343	0.170932	0.0292179
0331_TB_t2_w_Amp_3_125.fcs	0.519584	2.04836	0.019984	1.49102	1.56631	0.00399657	0.571807	1.59299	0.16793	0.0282005
0331_TB_t2_w_chl_1_095.fcs	2.91694	40.033	1.24369	1.58031	1.90535	0.0342037	1.29e-06	1.96669	0.130923	0.0171408
0331_TB_t2_w_chl_2_096.fcs	2.05213	36.7286	0.923707	1.57111	1.88384	0.0283474	6.01e-05	1.96986	0.135298	0.0183057
0331_TB_t2_w_chl_3_097.fcs	3.94283	56.5839	2.45365	1.59913	1.99097	0.0366397	2.17e-07	2.02637	0.129535	0.0167793
0331_TB_t2_w_NA_1_102.fcs	13.3293	96.9443	12.9904	1.65868	2.84369	0.112469	1.78e-57	2.86917	0.175577	0.0308271
0331_TB_t2_w_NA_2_103.fcs	15.7298	97.3567	15.4649	1.67017	2.8916	0.123304	1.22e-68	2.85941	0.180922	0.0327329
0331_TB_t2_w_NA_3_104.fcs	15.805	96.6595	15.3911	1.6738	2.9582	0.129945	2.97e-76	2.84021	0.209265	0.0437917
0331_TB_t2_w_SHX_1_116.fcs	0.988863	19.5825	0.179793	1.54889	1.78814	-0.00756527	0.284415	1.79077	0.139116	0.0193533
0331_TB_t2_w_SHX_2_117.fcs	1.07822	20.1018	0.214646	1.55228	1.79516	0.00642077	0.36349	1.79826	0.135351	0.0183199
0331_TB_t2_w_SHX_3_118.fcs	1.18305	23.4663	0.234613	1.55138	1.81411	0.0202554	0.00414349	1.81777	0.131276	0.0172334
0331_TB_t2_w_spec_1_109.fcs	0.836862	14.66	0.164384	1.53253	1.75815	0.0158727	0.0245164	1.81342	0.142591	0.0203322
0331_TB_t2_w_spec_2_110.fcs	0.434479	17.8086	0.129844	1.51328	1.77714	0.0201155	0.00441924	1.82189	0.138903	0.019294
0331_TB_t2_w_spec_3_111.fcs	0.518161	12.954	0.0946639	1.52714	1.7425	0.0261368	0.000212851	1.77747	0.137613	0.0189374
0331_TB_t3_n_1_004.fcs	0.359982	99.93	0.359982	1.51136	2.65966	0.018483	0.00894837	2.72258	0.102247	0.0104545
0331_TB_t3_n_2_005.fcs	0.159498	99.9053	0.159498	1.49784	2.55997	0.0344825	1.03e-06	2.63325	0.0931075	0.008669
0331_TB_t3_n_3_006.fcs	0.239988	99.97	0.234988	1.51098	2.67377	0.032078	5.69e-06	2.72235	0.0959622	0.00920875
0331_TB_t3_w_Amp_1_039.fcs	0.543207	60.9289	0.348849	1.53023	1.99974	0.0251256	0.000371569	2.04936	0.134902	0.0181986
0331_TB_t3_w_Amp_2_040.fcs	0.404353	93.0711	0.389377	1.52611	2.27046	0.00322023	0.648573	2.30113	0.128055	0.0163981
0331_TB_t3_w_Amp_3_041.fcs	0.968934	83.4382	0.869044	1.55	2.13573	0.0350416	7.07e-07	2.13024	0.122199	0.0149326
0331_TB_t3_w_chl_1_011.fcs	1.42928	99.253	1.41932	1.55785	2.39313	0.0687701	1.74e-22	2.4331	0.111275	0.012382
0331_TB_t3_w_chl_2_012.fcs	1.06192	99.9801	1.06192	1.55049	2.75161	0.0625547	7.48e-19	2.77844	0.106727	0.0113908
0331_TB_t3_w_chl_3_013.fcs	1.94073	89.8124	1.82099	1.5716	2.26872	0.0873926	2.76e-35	2.24492	0.141009	0.0198834
0331_TB_t3_w_NA_1_018.fcs	1.43042	79.5853	1.21112	1.55587	2.1052	0.0258972	0.000243828	2.1227	0.141581	0.0200453
0331_TB_t3_w_NA_2_019.fcs	2.20636	70.883	1.65727	1.57436	2.05517	0.0332596	2.5e-06	2.09555	0.141137	0.0199198
0331_TB_t3_w_NA_3_020.fcs	1.56429	63.1794	1.14582	1.56605	2.01522	0.0422055	2.2e-09	2.01048	0.150121	0.0225362
0331_TB_t3_w_SHX_1_032.fcs	0.578496	99.9551	0.568522	1.53947	2.99836	0.054886	7.4e-15	2.92739	0.136776	0.0187076
0331_TB_t3_w_SHX_2_033.fcs	0.679762	100	0.679762	1.54427	3.03493	0.0528757	7.22e-14	3.00132	0.124341	0.0154606
0331_TB_t3_w_SHX_3_034.fcs	0.804839	99.98	0.79984	1.54445	3.03473	0.0805093	3.96e-30	3.00433	0.118297	0.0139941
0331_TB_t3_w_spec_1_025.fcs	1.349	99.9502	1.349	1.5728	2.66845	0.0548636	7.17e-15	2.67356	0.103793	0.0107729
0331_TB_t3_w_spec_2_026.fcs	0.798842	99.9601	0.798842	1.5516	2.99064	0.0548704	7.8e-15	2.97016	0.0949627	0.00901791
0331_TB_t3_w_spec_3_027.fcs	1.6006	99.6709	1.59561	1.5756	2.43109	0.0436963	5.99e-10	2.46858	0.101913	0.0103863
strains:
"MG" - MG1655
"TB" - TB205
"230" - NN230
measured in the exponential phase, and time points t1, t2 and t3
N= 3 replicates

## Sheet: Fig 2AB Table 2
mild stress	percentage of GFP+ cells	percentage of mCherry+ cells	percentage of GFP+ and mCherry+ cells	mean log GFP fluorescence	mean log mCherry fluorescence	correlation between GFP and mCherry signals		mean log mCherry fluorescence	CV of log mCherry fluorescence	SCV of log mCherry fluorescence	dataset 150407				p-values
	gated dataset	gated dataset	gated dataset	gated dataset	gated dataset	gated dataset	gated dataset	entire dataset	entire dataset	entire dataset					pairwise comparisons: TB212 (no gfp reporter) vs NN230 (gfp reporter)
SAMPLE.ID	GFP%above	mCherry%above	all%above	GFP.H.LOG.Av	mCherry.H.LOG.Av	rho.mCherry.GFP	p.value.mCherry.GFP	MEAN.log.mCherry	CV.log.mCherry	SCV.log.mCherry					t-test per each measurement
0408_230_exp_1_001.fcs	3.54309	91.0025	3.24867	1.52991	2.18535	0.0384922	5.01987e-08	2.13413	0.118683	0.0140856					mCherry%above	all%above	MEAN.log.GFP	MEAN.log.mCherry
0408_230_exp_2_002.fcs	5.17457	92.5129	4.88487	1.5777	2.19964	0.0379171	8.01918e-08	2.1716	0.115977	0.0134507
0408_230_exp_3_003.fcs	4.33	89.845	3.895	1.56566	2.16824	0.0416339	3.85929e-09	2.11709	0.149975	0.0224925					mCherry+	mCherry+ GFP+	mean log GFP fluorescence	mean log mCherry fluorescence
0408_230_t1_Amp_1_043.fcs	9.33273	96.5214	9.08819	1.64146	2.31918	0.064537	6.00114e-20	2.30382	0.125653	0.0157887		time point t1	control	control	0.785963	0.603883	0.614156	0.807807
0408_230_t1_Amp_2_044.fcs	2.12745	35.1628	0.833999	1.56639	1.85852	0.0261343	0.00021682	1.88216	0.128784	0.0165853			stress	Amp	0.443657	0.366932	0.181043	0.444489
0408_230_t1_Amp_3_045.fcs	2.14104	50.6663	1.11294	1.56277	1.94312	0.0246805	0.000476045	1.97414	0.1232	0.0151782				Cam	0.870448	0.149369	0.213416	0.884232
0408_230_t1_chl_1_015.fcs	3.89942	96.6205	3.76943	1.60158	2.37709	0.0513368	3.73047e-13	2.26072	0.156814	0.0245906				NA	0.789534	0.194266	0.108718	0.673017
0408_230_t1_chl_2_016.fcs	3.05583	99.671	3.05085	1.58415	2.48802	0.0501893	1.1395e-12	2.42457	0.105503	0.0111309				SHX	0.296885	0.346541	0.225192	0.333493
0408_230_t1_chl_3_017.fcs	2.38785	98.2316	2.3329	1.57171	2.40193	0.0536059	3.21349e-14	2.37792	0.114956	0.0132148				Spec	0.880982	0.2864	0.1889	0.916419
0408_230_t1_n_1_008.fcs	8.00719	93.2907	7.56789	1.63458	2.2585	0.0757097	7.33912e-27	2.24844	0.123291	0.0152007
0408_230_t1_n_2_009.fcs	10.1635	80.9341	8.49865	1.64936	2.12029	0.0575139	3.56376e-16	2.10926	0.122934	0.0151128		time point t2	control	control	0.547365	0.205184	0.0491548	0.567628
0408_230_t1_n_3_010.fcs	9.28956	79.5051	7.64318	1.64534	2.12074	0.0618916	1.78224e-18	2.11671	0.129228	0.0166999			stress	Amp	0.372896	0.0852547	0.0156269	0.378158
0408_230_t1_NA_1_022.fcs	9.6517	81.7978	8.13194	1.64717	2.13221	0.0678231	6.67022e-22	2.11638	0.1264	0.015977				Cam	0.43252	0.196853	0.0970733	0.447192
0408_230_t1_NA_2_023.fcs	4.64376	77.1491	3.79854	1.60171	2.06799	0.0598418	1.9988e-17	2.08193	0.0966833	0.00934766				NA	0.78835	0.0136767	0.00073988	0.739768
0408_230_t1_NA_3_024.fcs	3.75399	81.0353	3.23482	1.59209	2.09162	0.0494814	2.43166e-12	2.10092	0.093332	0.00871086				SHX	0.553294	0.0837576	0.000317892	0.585478
0408_230_t1_SHX_1_036.fcs	7.12362	91.2252	6.71456	1.63013	2.22491	0.065862	1.01416e-20	2.20746	0.128054	0.0163978				Spec	0.564428	0.142858	0.000552924	0.563521
0408_230_t1_SHX_2_037.fcs	1.57984	43.4507	0.874913	1.5498	1.90494	0.038326	5.89251e-08	1.87288	0.134531	0.0180986			recovery	w_Amp	0.545703	0.000179008	0.000151163	0.968215
0408_230_t1_SHX_3_038.fcs	1.75666	45.264	0.938217	1.55612	1.91343	0.0324111	4.45606e-06	1.88117	0.131896	0.0173967				w_Cam	0.337808	0.14902	0.0100451	0.37449
0408_230_t1_spec_1_029.fcs	7.56962	77.8311	6.17969	1.63146	2.10596	0.0672495	1.71627e-21	2.08796	0.131543	0.0173037				w_NA	0.248152	0.00633732	0.00166707	0.327253
0408_230_t1_spec_2_030.fcs	2.3221	84.1448	1.97253	1.57127	2.11668	0.0356314	4.57137e-07	2.11573	0.101969	0.0103977				w_SHX	0.29668	0.0539854	0.0219675	0.237449
0408_230_t1_spec_3_031.fcs	2.47129	77.8532	1.98702	1.57316	2.07141	0.0374092	1.18398e-07	2.0559	0.0992652	0.00985357				w_Spec	0.186571	0.0404282	0.000164665	0.207117
0408_230_t2_Amp_1_085.fcs	4.18832	84.8111	3.69352	1.54669	2.1742	0.0513966	3.48005e-13	2.11672	0.127684	0.0163033
0408_230_t2_Amp_2_086.fcs	4.73742	35.5132	1.7522	1.53953	1.87312	0.00503572	0.476039	1.85401	0.126062	0.0158916		time point t3	control	control	0.650291	0.150356	0.132127	0.798322
0408_230_t2_Amp_3_087.fcs	4.35867	35.4778	1.89507	1.54175	1.87	0.0319427	6.06485e-06	1.84437	0.127914	0.016362			recovery	w_Amp	0.719027	0.000255092	0.00135902	0.456303
0408_230_t2_chl_1_057.fcs	1.45549	55.2039	0.88725	1.54767	1.96891	0.0200123	0.00458742	1.95144	0.137535	0.0189158				w_Cam	0.547675	0.000453985	0.00635696	0.980433
0408_230_t2_chl_2_058.fcs	1.48226	33.2535	0.484104	1.54246	1.8583	0.0208907	0.00310389	1.86074	0.137527	0.0189137				w_NA	0.476456	0.00681042	0.00180311	0.516258
0408_230_t2_chl_3_059.fcs	1.21665	27.4395	0.378958	1.53847	1.82499	0.0104158	0.140216	1.81919	0.136334	0.018587				w_SHX	0.423101	0.00679092	0.000625701	0.370712
0408_230_t2_n_1_050.fcs	2.65076	95.4024	2.58087	1.56408	2.28479	0.0676813	8.83953e-22	2.18482	0.127491	0.0162539				w_Spec	0.520186	0.031663	0.00380591	0.432373
0408_230_t2_n_2_051.fcs	2.91712	22.5691	0.822778	1.55946	1.79922	0.0357051	4.24617e-07	1.7552	0.16452	0.0270667
0408_230_t2_n_3_052.fcs	3.89986	24.0624	1.00738	1.58717	1.80694	0.0176018	0.012683	1.76892	0.14173	0.0200873					differences in mCherry fluorescence should			differences in mCherry fluorescence should
0408_230_t2_NA_1_064.fcs	4.88756	32.039	1.71414	1.60198	1.84505	0.0343692	1.15687e-06	1.8269	0.145773	0.0212497					not be significant because			not be significant because
0408_230_t2_NA_2_065.fcs	6.3714	31.4475	2.31687	1.61523	1.85485	0.0429795	1.16671e-09	1.81059	0.129408	0.0167465					they were measured in identical conditions			these are the same mCherry reporters measured in identical conditions
0408_230_t2_NA_3_066.fcs	6.10462	25.2221	1.63722	1.60955	1.81752	0.0282464	6.3721e-05	1.78032	0.132642	0.0175939
0408_230_t2_SHX_1_078.fcs	2.68654	75.2679	2.10337	1.49419	2.09259	0.0359891	3.41499e-07	2.03827	0.130407	0.0170059
0408_230_t2_SHX_2_079.fcs	2.32268	45.03	1.17383	1.49402	1.9199	0.0386641	4.44046e-08	1.86523	0.129667	0.0168136
0408_230_t2_SHX_3_080.fcs	2.84105	27.0099	0.947017	1.49298	1.82544	0.0225734	0.00138577	1.79393	0.134249	0.0180227
0408_230_t2_spec_1_071.fcs	3.90633	89.5366	3.60737	1.57843	2.20808	0.0450369	1.73471e-10	2.13574	0.1224	0.0149817
0408_230_t2_spec_2_072.fcs	4.70201	35.1702	1.70211	1.58876	1.87348	0.0311915	1.00687e-05	1.83717	0.129152	0.0166802
0408_230real_t2_spec_3_.fcs	4.3112	28.7929	1.35068	1.58757	1.8432	0.0377625	8.76909e-08	1.81772	0.141921	0.0201416
0408_230_t2_w_Amp_1_120.fcs	2.92885	97.4703	2.88394	1.58503	2.32604	0.0399949	1.47895e-08	2.31077	0.114256	0.0130544
0408_230_t2_w_Amp_2_121.fcs	2.85871	95.7769	2.73877	1.58352	2.30017	0.0567041	9.99455e-16	2.28408	0.106605	0.0113646
0408_230_t2_w_Amp_3_122.fcs	3.11985	98.4476	3.0899	1.58867	2.38284	0.0435037	7.27621e-10	2.34534	0.103108	0.0106312
0408_230_t2_w_chl_1_092.fcs	2.63355	18.5595	0.603521	1.58118	1.77511	0.0197261	0.00521894	1.7523	0.136162	0.0185402
0408_230_t2_w_chl_2_093.fcs	2.23143	19.1693	0.564097	1.5716	1.78626	0.0242076	0.000611429	1.75844	0.135361	0.0183226
0408_230_t2_w_chl_3_094.fcs	1.93996	17.4646	0.364053	1.57047	1.77225	0.0165278	0.0192615	1.74711	0.133459	0.0178114
0408_230_t2_w_NA_1_099.fcs	4.0733	35.6787	1.58849	1.59833	1.87836	0.0244051	0.000542651	1.84831	0.123198	0.0151777
0408_230_t2_w_NA_2_100.fcs	4.60166	28.4176	1.42088	1.60303	1.8374	0.0261786	0.000208922	1.81954	0.123588	0.015274
0408_230_t2_w_NA_3_101.fcs	3.89636	30.9567	1.4848	1.59953	1.85251	0.0457889	8.59246e-11	1.81773	0.126682	0.0160484
0408_230_t2_w_SHX_1_113.fcs	1.82918	96.9964	1.76421	1.56367	2.32933	0.045806	9.02713e-11	2.31269	0.112689	0.0126988
0408_230_t2_w_SHX_2_114.fcs	3.21391	99.9203	3.21391	1.5885	2.56142	0.061495	2.79679e-18	2.46608	0.096415	0.00929585
0408_230_t2_w_SHX_3_115.fcs	3.02985	99.7359	3.02487	1.58326	2.53696	0.0629443	4.4625e-19	2.45643	0.106548	0.0113524
0408_230_t2_w_spec_1_10.fcs	4.13879	31.2581	1.45282	1.59352	1.85403	0.0342347	1.25803e-06	1.83199	0.130287	0.0169746
0408_230_t2_w_spec_2_10.fcs	3.69798	27.7997	1.10142	1.59455	1.83394	0.0267029	0.000154996	1.80637	0.124983	0.0156207
0408_230_t2_w_spec_3_10.fcs	4.38776	37.1138	1.85194	1.59845	1.8864	0.0226119	0.00137114	1.85571	0.124529	0.0155076
0408_230_t3_n_1_127.fcs	1.57492	99.835	1.57492	1.51706	2.64342	0.0414662	4.45057e-09	2.67269	0.107112	0.011473
0408_230_t3_n_2_128.fcs	8.75636	99.99	8.75636	1.61415	2.96766	0.139227	2.36359e-87	2.92349	0.091059	0.00829175
0408_230_t3_n_3_129.fcs	7.09552	99.995	7.09552	1.61055	2.9284	0.117838	5.58138e-63	2.88498	0.0809436	0.00655186
0408_230_t3_w_Amp_1_162.fcs	4.9609	99.9203	4.9609	1.60254	2.78898	0.0816657	4.62438e-31	2.71544	0.0908844	0.00825998
0408_230_t3_w_Amp_2_163.fcs	4.64515	99.9751	4.64515	1.59692	2.78393	0.0772763	5.12806e-28	2.73148	0.0833716	0.00695082
0408_230_t3_w_Amp_3_164.fcs	4.44833	99.9551	4.44833	1.59685	2.77313	0.0473046	2.10952e-11	2.72309	0.0791796	0.00626941
0408_230_t3_w_chl_1_134.fcs	2.94455	99.3971	2.93458	1.57665	2.66098	0.0515066	2.84705e-13	2.62375	0.125516	0.0157543
0408_230_t3_w_chl_2_135.fcs	3.45619	99.9352	3.45619	1.58586	2.68979	0.0429228	1.19914e-09	2.68679	0.102461	0.0104984
0408_230_t3_w_chl_3_136.fcs	3.1857	99.9501	3.1857	1.57882	2.68077	0.0317698	6.8977e-06	2.67967	0.0949841	0.00902197
0408_230_t3_w_NA_1_141.fcs	15.2738	99.5216	15.2639	1.66937	2.92438	0.107758	6.71059e-53	2.86626	0.107575	0.0115725
0408_230_t3_w_NA_2_142.fcs	14.1886	99.96	14.1836	1.66522	2.95331	0.139493	1.84833e-87	2.83989	0.0952722	0.00907679
0408_230_t3_w_NA_3_143.fcs	11.9376	99.995	11.9376	1.65158	2.97645	0.0915891	1.18949e-38	2.89121	0.0876666	0.00768543
0408_230_t3_w_SHX_1_155.fcs	3.62348	96.4614	3.59852	1.58228	2.6868	0.105065	2.74918e-50	2.54084	0.179356	0.0321686
0408_230_t3_w_SHX_2_156.fcs	3.9988	99.9651	3.99381	1.58617	2.73633	0.059206	5.01632e-17	2.64258	0.0875908	0.00767215
0408_230_t3_w_SHX_3_157.fcs	2.98322	99.8705	2.98322	1.57718	2.68534	0.0568822	7.24829e-16	2.59422	0.0948374	0.00899413
0408_230_t3_w_spec_1_14.fcs	11.9832	99.975	11.9832	1.6468	3.08157	0.0978403	9.60575e-44	3.0533	0.104664	0.0109546
0408_230_t3_w_spec_2_14.fcs	19.7552	99.99	19.7552	1.68543	3.148	0.113842	9.76732e-59	3.10922	0.0787331	0.0061989
0408_230_t3_w_spec_3_15.fcs	13.3413	99.9851	13.3363	1.66114	3.08162	0.0955673	5.61927e-42	3.04038	0.0852801	0.00727269
0408_MG_exp_007.fcs	4.31957	3.68963	0.139986	1.53099	1.61719	0.00275483	0.696841	1.62076	0.151658	0.0230001
0408_MG_t1_Amp_049.fcs	1.03787	1.65161	0.0249489	1.53479	1.53649	0.013031	0.0650785	1.54051	0.169279	0.0286554
0408_MG_t1_chl_021.fcs	2.81044	1.58461	0.0348814	1.58311	1.53662	0.0121895	0.084214	1.53454	0.172425	0.0297304
0408_MG_t1_n_014.fcs	7.56344	1.41098	0.129631	1.63159	1.50454	-0.00129023	0.855022	1.51302	0.18747	0.035145
0408_MG_t1_NA_028.fcs	2.44012	2.20559	0.0499002	1.56892	1.54552	0.0123416	0.0806262	1.54558	0.172355	0.0297062
0408_MG_t1_SHX_042.fcs	0.831549	1.70791	0.00497934	1.53659	1.53679	0.0136792	0.0525604	1.53421	0.174293	0.0303782
0408_MG_t1_spec_035.fcs	1.63518	1.75482	0.0498529	1.55607	1.53905	0.0117513	0.0960559	1.53665	0.172173	0.0296434
0408_MG_t2_Amp_091.fcs	1.58414	2.10222	0.0149447	1.48728	1.58645	0.00890743	0.206957	1.58204	0.150083	0.0225248
0408_MG_t2_chl_063.fcs	1.02316	1.86664	0.0249551	1.54042	1.55145	0.00733174	0.299388	1.5499	0.168689	0.0284559
0408_MG_t2_n_056.fcs	0.87321	1.6566	0.0199591	1.50046	1.53506	-0.00110123	0.876122	1.5274	0.180313	0.032513
0408_MG_t2_NA_070.fcs	1.83505	1.9996	0.0199461	1.56017	1.58129	0.00907653	0.19869	1.57298	0.153887	0.0236811
0408_MG_t2_SHX_084.fcs	1.17612	1.92365	0.0299013	1.46624	1.58404	0.0121885	0.0842544	1.58092	0.147789	0.0218416
0408_MG_t2_spec_077.fcs	1.87793	1.97782	0.0349615	1.55831	1.57674	0.00225119	0.75009	1.57204	0.155489	0.0241767
0408_MG_t2_w_Amp_126.fcs	0.928839	2.00749	0.019975	1.54827	1.58145	0.0105241	0.136433	1.5796	0.155308	0.0241205
0408_MG_t2_w_chl_098.fcs	1.81491	1.9999	0.0499975	1.56029	1.57931	0.00193336	0.784539	1.57354	0.154703	0.023933
0408_MG_t2_w_NA_105.fcs	1.90243	2.18205	0.0499326	1.5722	1.59326	0.0053231	0.45129	1.59063	0.14426	0.0208108
0408_MG_t2_w_SHX_119.fcs	0.949715	2.15935	0.0149955	1.54408	1.58613	0.00157093	0.824172	1.58054	0.151676	0.0230055
0408_MG_t2_w_spec_112.fcs	1.39986	2.32477	0.0549945	1.55899	1.59031	0.00052896	0.94037	1.58713	0.150068	0.0225205
0408_MG_t3_n_133.fcs	0.334782	1.47904	0.0149903	1.44699	1.50159	0.0155063	0.0282618	1.5002	0.196779	0.0387218
0408_MG_t3_w_Amp_168.fcs	0.637831	2.07794	0.00996612	1.51983	1.57106	0.00589224	0.403909	1.56837	0.160064	0.0256206
0408_MG_t3_w_chl_140.fcs	1.42579	1.88943	0.0249265	1.55313	1.56275	0.00170995	0.808653	1.55526	0.165048	0.0272407
0408_MG_t3_w_NA_147.fcs	2.04734	2.03236	0.0649156	1.57114	1.58039	0.00542153	0.442976	1.57971	0.158803	0.0252185
0408_MG_t3_w_SHX_161.fcs	0.642238	1.91178	0.00995718	1.51448	1.57074	-0.00513752	0.466567	1.56303	0.159627	0.0254807
0408_MG_t3_w_spec_154.fcs	1.46398	1.54892	0.0149895	1.51156	1.51858	0.0127271	0.0717867	1.51883	0.186328	0.0347181
0408_TB_exp_1_004.fcs	4.46927	93.2711	4.2498	1.56403	2.2068	0.028748	4.68042e-05	2.21501	0.110305	0.0121672
0408_TB_exp_2_005.fcs	4.09091	84.4905	3.48152	1.56015	2.12624	0.0426445	1.57766e-09	2.15399	0.114329	0.0130711
0408_TB_exp_3_006.fcs	4.83075	88.1898	4.33721	1.57148	2.15534	0.0253798	0.000324532	2.15968	0.113077	0.0127864
0408_TB_t1_Amp_1_046.fcs	0.953237	34.7757	0.424215	1.53497	1.86263	0.0347389	8.71886e-07	1.91261	0.144448	0.0208652
0408_TB_t1_Amp_2_047.fcs	1.12808	44.9136	0.529101	1.53757	1.91754	0.0311061	1.06474e-05	1.99009	0.141641	0.0200621
0408_TB_t1_Amp_3_048.fcs	1.27579	50.0548	0.692714	1.54341	1.93863	0.0189199	0.00735865	1.97553	0.126875	0.0160974
0408_TB_t1_chl_1_018.fcs	2.18443	98.6933	2.11461	1.56873	2.39065	0.0293582	3.2133e-05	2.34269	0.134021	0.0179617
0408_TB_t1_chl_2_019.fcs	2.08843	99.6003	2.08344	1.56737	2.45736	0.0601877	1.5653e-17	2.48653	0.0994294	0.0098862
0408_TB_t1_chl_3_020.fcs	2.20427	96.8532	2.10952	1.57538	2.40041	0.0389871	3.34156e-08	2.39576	0.120739	0.014578
0408_TB_t1_n_1_011.fcs	9.48814	85.3233	8.45943	1.64596	2.17167	0.0613532	3.63333e-18	2.20462	0.141258	0.0199539
0408_TB_t1_n_2_012.fcs	10.6752	89.5047	9.74062	1.65124	2.20726	0.0639651	1.34367e-19	2.19787	0.135466	0.0183509
0408_TB_t1_n_3_013.fcs	8.89321	73.1757	7.00284	1.6409	2.07294	0.0589763	6.40738e-17	2.07875	0.15032	0.0225962
0408_TB_t1_NA_1_025.fcs	2.55975	78.9531	2.15059	1.57034	2.08135	0.0466193	4.03205e-11	2.07559	0.111033	0.0123283
0408_TB_t1_NA_2_026.fcs	2.65655	83.5614	2.36692	1.57558	2.11296	0.0390666	3.19863e-08	2.14702	0.103915	0.0107983
0408_TB_t1_NA_3_027.fcs	2.18727	74.9713	1.7628	1.55983	2.06543	0.0279397	7.6769e-05	2.09472	0.111022	0.0123258
0408_TB_t1_SHX_1_039.fcs	0.85957	33.4783	0.37981	1.53023	1.857	0.0447987	2.29961e-10	1.87143	0.160703	0.0258256
0408_TB_t1_SHX_2_040.fcs	1.19766	41.9682	0.588852	1.53506	1.90633	0.0391635	2.92718e-08	1.94561	0.16065	0.0258085
0408_TB_t1_SHX_3_041.fcs	1.07157	39.1148	0.468501	1.5369	1.88113	0.0145129	0.0398121	1.90835	0.147128	0.0216465
0408_TB_t1_spec_1_032.fcs	1.28007	67.3457	0.961299	1.54647	2.02237	0.0303785	1.66864e-05	2.04591	0.107053	0.0114603
0408_TB_t1_spec_2_033.fcs	1.9295	90.2378	1.75998	1.55829	2.16129	0.0305514	1.50802e-05	2.1892	0.106431	0.0113275
0408_TB_t1_spec_3_034.fcs	1.62905	85.9064	1.38993	1.55633	2.12568	0.0364713	2.35823e-07	2.14488	0.104318	0.0108822
0408_TB_t2_Amp_1_088.fcs	1.20368	34.8866	0.424533	1.49339	1.86884	0.0108429	0.124978	1.94075	0.171354	0.0293621
0408_TB_t2_Amp_2_089.fcs	1.56422	34.5177	0.609695	1.49907	1.86732	0.0180699	0.0105833	1.92632	0.164115	0.0269338
0408_TB_t2_Amp_3_090.fcs	1.16551	30.2585	0.378543	1.47297	1.84134	0.00788719	0.263776	1.9214	0.161274	0.0260094
0408_TB_t2_chl_1_060.fcs	1.08473	26.4484	0.369908	1.53832	1.82443	0.00612954	0.385991	1.82991	0.139503	0.0194612
0408_TB_t2_chl_2_061.fcs	0.744479	31.5529	0.209853	1.52475	1.84831	0.00259132	0.713937	1.85516	0.141464	0.0200122
0408_TB_t2_chl_3_062.fcs	0.904638	33.0668	0.304878	1.53329	1.85651	0.0164744	0.0197895	1.8693	0.137762	0.0189784
0408_TB_t2_n_1_053.fcs	1.11494	31.6384	0.434978	1.5275	1.8519	0.0330327	2.97375e-06	1.83726	0.151722	0.0230195
0408_TB_t2_n_2_054.fcs	0.854231	25.8817	0.294735	1.50487	1.81974	0.0378016	8.79838e-08	1.81097	0.171733	0.0294922
0408_TB_t2_n_3_055.fcs	1.47997	32.6988	0.607933	1.5472	1.89173	0.0198928	0.00483011	1.86916	0.184242	0.0339452
0408_TB_t2_NA_1_067.fcs	2.38772	31.5338	0.877324	1.56695	1.8728	0.0223892	0.00151739	1.92301	0.179975	0.0323911
0408_TB_t2_NA_2_068.fcs	2.0028	31.1108	0.699231	1.55717	1.85895	0.0117967	0.0950828	1.88832	0.161906	0.0262136
0408_TB_t2_NA_3_069.fcs	1.78741	23.0166	0.439363	1.55574	1.80974	0.0190184	0.00711028	1.81655	0.15812	0.0250019
0408_TB_t2_SHX_1_081.fcs	0.629371	38.2767	0.21978	1.41153	1.89277	0.0216609	0.00217661	1.94213	0.170523	0.0290781
0408_TB_t2_SHX_2_082.fcs	0.57	39.15	0.275	1.40492	1.88975	0.0291491	3.74089e-05	1.92282	0.154092	0.0237444
0408_TB_t2_SHX_3_083.fcs	0.632659	40.0518	0.31882	1.40845	1.90418	0.0274481	0.000100487	1.95969	0.166906	0.0278576
0408_TB_t2_spec_1_074.fcs	1.60759	32.9306	0.584124	1.5334	1.8707	0.016684	0.0182127	1.84843	0.153695	0.0236221
0408_TB_t2_spec_2_075.fcs	1.33599	40.1097	0.588235	1.52943	1.90876	0.0107564	0.127657	1.90844	0.149257	0.0222777
0408_TB_t2_spec_3_073.fcs	1.35952	40.7857	0.539811	1.53607	1.90428	0.0028272	0.68925	1.90482	0.139447	0.0194455
0408_TB_t2_w_Amp_1_123.fcs	0.893303	99.5608	0.888312	1.54978	2.47302	0.0228049	0.00124495	2.49844	0.121902	0.01486
0408_TB_t2_w_Amp_2_124.fcs	1.19934	99.2504	1.18435	1.5546	2.42906	0.0434161	8.03819e-10	2.47557	0.122485	0.0150025
0408_TB_t2_w_Amp_3_125.fcs	1.13518	75.9223	0.876276	1.55511	2.09048	0.0326056	3.80326e-06	2.12389	0.125936	0.0158598
0408_TB_t2_w_chl_1_095.fcs	1.65603	19.1441	0.349162	1.55884	1.78439	0.0288227	4.47213e-05	1.77705	0.143923	0.0207138
0408_TB_t2_w_chl_2_096.fcs	1.3324	23.3694	0.404212	1.55252	1.82002	0.0255198	0.000302756	1.80154	0.1575	0.0248062
0408_TB_t2_w_chl_3_097.fcs	1.29715	18.4494	0.294352	1.55001	1.77561	0.0279602	7.52511e-05	1.76577	0.141712	0.0200822
0408_TB_t2_w_NA_1_102.fcs	2.16763	31.4381	0.812238	1.57346	1.85649	0.0290335	3.89635e-05	1.83965	0.132187	0.0174734
0408_TB_t2_w_NA_2_103.fcs	1.83936	27.3954	0.529815	1.56723	1.84069	0.0318552	6.58576e-06	1.84421	0.155668	0.0242324
0408_TB_t2_w_NA_3_104.fcs	1.81201	23.7858	0.45425	1.56449	1.81142	0.0167956	0.0174427	1.8073	0.132801	0.017636
0408_TB_t2_w_SHX_1_116.fcs	1.15665	69.7029	0.877455	1.55341	2.05003	0.0331162	2.71714e-06	2.04663	0.128474	0.0165057
0408_TB_t2_w_SHX_2_117.fcs	0.908048	99.3514	0.89308	1.53944	2.5003	0.0392682	2.6804e-08	2.51301	0.14442	0.020857
0408_TB_t2_w_SHX_3_118.fcs	0.792938	90.7042	0.713146	1.53516	2.22006	0.031055	1.09089e-05	2.2719	0.128371	0.016479
0408_TB_t2_w_spec_1_109.fcs	1.95776	27.5929	0.488194	1.56848	1.83299	0.00893447	0.205582	1.82082	0.130772	0.0171012
0408_TB_t2_w_spec_2_110.fcs	1.63558	24.4091	0.428842	1.56457	1.81726	0.0125494	0.0755505	1.80004	0.132653	0.0175969
0408_TB_t2_w_spec_3_111.fcs	1.82081	28.5593	0.618577	1.56621	1.8417	0.0220352	0.00180843	1.81704	0.139107	0.0193508
0408_TB_t3_n_1_130.fcs	0.638086	99.9352	0.633101	1.48362	2.77616	0.035464	5.05657e-07	2.90592	0.135632	0.0183962
0408_TB_t3_n_2_131.fcs	0.924769	99.99	0.924769	1.51178	2.92965	0.035501	5.10053e-07	2.96441	0.112396	0.0126329
0408_TB_t3_n_3_132.fcs	1.05979	99.98	1.05979	1.52352	2.92948	0.0351343	6.67931e-07	2.9491	0.121916	0.0148634
0408_TB_t3_w_Amp_1_165.fcs	0.743773	99.9151	0.738781	1.52347	2.76653	0.0329365	3.12027e-06	2.7578	0.102639	0.0105348
0408_TB_t3_w_Amp_2_166.fcs	0.702996	100	0.702996	1.5298	2.78974	0.0349324	7.48168e-07	2.79739	0.100104	0.0100208
0408_TB_t3_w_Amp_3_167.fcs	0.924122	99.97	0.924122	1.53886	2.93216	0.0361918	3.02183e-07	3.00765	0.106774	0.0114007
0408_TB_t3_w_chl_1_137.fcs	1.28775	99.8702	1.28775	1.54962	2.81514	0.0332769	2.46272e-06	2.81747	0.137732	0.01897
0408_TB_t3_w_chl_2_138.fcs	0.854957	99.855	0.854957	1.53285	2.59632	0.0259204	0.000246201	2.74639	0.143377	0.020557
0408_TB_t3_w_chl_3_139.fcs	0.908955	99.9501	0.90396	1.53418	2.6258	0.0329227	3.16783e-06	2.70463	0.123344	0.0152138
0408_TB_t3_w_NA_1_144.fcs	2.21426	99.8955	2.21426	1.56794	2.90529	0.0520785	1.49724e-13	2.93922	0.114068	0.0130116
0408_TB_t3_w_NA_2_145.fcs	2.02302	99.9851	2.02302	1.57005	2.84031	0.0546001	9.92398e-15	2.84206	0.132377	0.0175237
0408_TB_t3_w_NA_3_146.fcs	2.08791	99.995	2.08791	1.56491	2.99877	0.0619164	1.80998e-18	2.97311	0.117991	0.0139219
0408_TB_t3_w_SHX_1_158.fcs	0.639488	99.8951	0.634492	1.51848	2.8704	0.0228532	0.00122307	2.85442	0.108058	0.0116766
0408_TB_t3_w_SHX_2_159.fcs	0.669297	99.9151	0.669297	1.52276	2.80408	0.0409334	6.87465e-09	2.7881	0.117752	0.0138656
0408_TB_t3_w_SHX_3_160.fcs	0.429227	99.9401	0.424236	1.50819	2.65411	0.0290263	3.96951e-05	2.75087	0.118436	0.0140271
0408_TB_t3_w_spec_1_151.fcs	2.29678	99.99	2.29678	1.56213	3.09921	0.0733777	2.53714e-25	3.12701	0.0963003	0.00927375
0408_TB_t3_w_spec_2_152.fcs	2.53399	99.995	2.53399	1.56781	3.08266	0.0507603	6.75963e-13	3.11106	0.110067	0.0121147
0408_TB_t3_w_spec_3_153.fcs	4.11873	99.8705	4.11873	1.58918	3.06221	0.0673691	1.21823e-21	3.09979	0.122058	0.0148981
strains:
"MG" - MG1655
"TB" - TB205
"230" - NN230
measured in the exponential phase, and time points t1, t2 and t3
N= 3 replicates

## Sheet: Fig 2C
	FSC-SSC autogating of ~20,000 cells	defining GFP+ (FITC+) and GFP- (FITC-) fractions	number of cells in the fraction	mean log GFP fluorescence	mean log mCherry fluorescence	correlation between GFP and mCherry signals
SAMPLE.ID			CELLS	MEAN.log.GFP	MEAN.log.mCherry	rho.mCherry.GFP	p.value.mCherry.GFP
0408_230_t3_w_spec_1_14.fcs	rep1<c9>20k.fcs	rep1<c9>20k.fcs	20440	1.65208	3.09248	0.103689	5.69555e-50
		rep1<c9>FITC-H-.fcs	17973	1.62214	3.08966	0.0695687	9.8839e-21
		rep1<c9>FITC-H+.fcs	2467	1.87021	3.11303	0.0265381	0.187611
0408_230_t3_w_spec_2_14.fcs	rep2<c9>20k.fcs	rep2<c9>20k.fcs	20546	1.68048	3.13649	0.0877742	1.98142e-36
		rep2<c9>FITC-H-.fcs	16985	1.63951	3.13405	0.0653195	1.57724e-17
		rep2<c9>FITC-H+.fcs	3561	1.8759	3.14815	0.00325963	0.845825
0408_230_t3_w_spec_3_15.fcs	rep3<c9>20k.fcs	rep3<c9>20k.fcs	20542	1.65758	3.0738	0.0724772	2.4578e-25
		rep3<c9>FITC-H-.fcs	18129	1.62901	3.07184	0.0409734	3.414e-08
		rep3<c9>FITC-H+.fcs	2413	1.8722	3.08847	0.0225446	0.26829
strain NN230 measured in time point t3
in the recovery after mild Spec-treatment
gating procedure:
1) FSC-SSC autogating of ~20,000 cells
2) then defining GFP+ (FITC+) and GFP- (FITC-) fractions

## Sheet: Fig 3BC
	mean log GFP fluorescence	mean log mCherry fluorescence	CV of log GFP fluorescence	SCV of log GFP fluorescence	CV of log mCherry fluorescence	SCV of log mCherry fluorescence	t-tests	p-values
SAMPLE.ID	MEAN.log.GFP	MEAN.log.mCherry	CV.log.GFP	SCV.log.GFP	CV.log.mCherry	SCV.log.mCherry		MEAN.log.GFP	MEAN.log.mCherry	CV.log.GFP	SCV.log.GFP	CV.log.mCherry	SCV.log.mCherry
140611_207_exp_1_003.fcs	2.27038	2.34157	0.131507	0.017294	0.14297	0.0204405	207 vs 214	0.168409	0.341777	0.119993	0.124741	0.333539	0.324855
140611_207_exp_2_004.fcs	2.23768	2.34752	0.119763	0.0143432	0.139499	0.01946
140611_207_exp_3_005.fcs	2.24569	2.36513	0.1222	0.0149329	0.141501	0.0200224
140611_207_exp_4_.fcs	2.28484	2.24691	0.140645	0.0197811	0.128649	0.0165506
140611_207_exp_5_007.fcs	2.19163	2.35335	0.119874	0.0143698	0.139275	0.0193976
140611_214_exp_1_008.fcs	2.29889	2.33569	0.132528	0.0175637	0.137164	0.0188141
140611_214_exp_2_009.fcs	2.26006	2.37137	0.135935	0.0184783	0.141207	0.0199395
140611_214_exp_3_010.fcs	2.32947	2.35415	0.145248	0.021097	0.132428	0.0175371
140611_214_exp_4_011.fcs	2.28078	2.34324	0.139068	0.01934	0.135497	0.0183595
140611_214_exp_5_012.fcs	2.23404	2.3683	0.126403	0.0159777	0.128516	0.0165165
strains NN207 and NN214
measured in the exponential phase
N= 5 replicates
flow cytometer Fortessa

## Sheet: Fig 4A
	OD600 measurements
	untreated cultures			with 0.1% Ara
Time / h	NN204-1	NN204-2	NN204-3	NN204-1	NN204-2	NN204-3
0	0.0077	0.0065	0.006
2	0.15	0.11	0.13
3	0.34	0.25	0.24	0.28	0.24	0.24
4.5	1.71	1.38	1.6	1.03	0.97	1.07
5.5	2.87	2.74	2.56	1.95	1.88	1.85
6.5	4.95	4.95	4.9	3.06	2.95	2.92
7.5	6.14	6.1	6.2	4.38	2.91	4.61
8.5	9.74	8.58	7.48	5.3	5.6	5.47
OD values measured for strain NN204 in given time points

## Sheet: Fig 4B
cell length in µm for strain NN207
exponential phase	after 3h with 0.2% Ara	after 22h	after 22h with 0.2% Ara
207exp	207expH	207dayn	207dayH
3.2214	1.7	1.25751	2.04371		sample name	207exp	207expH	207dayn	207dayH
2.76038	2.12117	1.90032	1.77063		mean length	3.46409	2.64349	1.78271	1.82792	µm
2.52465	2.90567	2.80629	2.83045		st.dev	0.860226	0.733435	0.379463	0.459787
3.20259	2.06719	1.73744	1.79439		cell count	383	2421	3164	1519
2.42108	2.01014	1.81804	1.36909		percentage of cells longer than 7 µm	0	0.123916	0	0.0658328	%
3.04888	2.63521	2.40546	1.41122
2.8471	2.34588	1.83405	3.0899
3.13947	2.24242	2.0647	2.26007
2.34617	2.47217	2.34597	1.79303
3.06613	2.88911	2.22505	1.77926
2.37971	2.37717	1.49358	2.25855
2.52832	2.33187	1.29299	2.08007
3.23751	2.37504	1.51167	2.12102
2.39995	2.93363	1.41798	1.46709
3.20071	2.28306	2.01232	2.17292
3.83016	2.76972	1.76652	1.65047
3.3789	2.79698	1.6926	2.29595
3.83836	2.06565	2.18338	1.22242
4.92657	2.97115	1.43547	2.26345
4.62458	2.65448	1.82122	1.30061
2.34136	3.14339	1.98838	1.48996
4.30955	3.18646	1.53392	1.95492
3.42703	1.68664	2.47654	2.19808
3.72807	1.95365	2.02787	2.10199
4.24182	2.63982	1.91715	1.67966
3.66764	2.98344	2.20935	2.23729
3.41388	2.22507	1.98068	1.51468
2.82969	2.07153	1.86999	1.84682
4.48787	2.09962	2.06524	1.72933
4.48258	3.19208	1.66199	1.87724
3.63494	2.71921	2.01626	2.01287
3.6031	3.04111	1.38688	1.66225
4.58759	3.08821	1.70923	1.52823
4.06001	2.40458	2.00716	1.65107
3.82985	2.18129	1.59277	1.95232
3.48117	2.23677	1.94766	2.02559
4.57026	2.21558	1.63619	1.35945
3.55419	3.20948	1.2167	2.37109
4.17196	1.94984	1.71026	1.50119
3.36507	2.79013	1.73866	1.5283
3.97322	2.17933	1.68257	2.66138
2.43917	2.86941	1.45201	1.86912
3.46379	2.46494	1.92858	1.84814
3.96172	2.26621	1.60095	2.1186
2.61684	2.04935	1.99125	1.42576
3.17064	2.30688	2.07459	1.59835
4.43254	2.70095	1.38494	1.59152
2.20524	2.14044	1.64124	1.91452
2.11839	1.87032	2.07426	2.07137
2.16198	2.12322	1.73888	1.46907
2.85179	2.30499	1.80613	1.52961
4.96278	1.84175	1.95938	2.24948
2.43165	3.25592	1.4466	1.76896
2.33827	2.16888	1.44597	1.56079
1.81665	2.13718	1.67635	1.96968
2.49211	2.43398	1.78308	1.25898
2.79793	3.16763	2.2095	1.69365
2.34868	2.87402	1.52977	1.64114
4.16625	2.58416	1.57501	1.65407
2.86658	2.52176	1.8144	2.30284
2.4437	2.51461	1.28335	1.67707
2.79107	2.08961	1.94091	1.37128
2.94188	1.93609	1.89118	1.53574
2.6611	2.84122	1.55436	2.06445
2.46486	1.76305	1.7049	2.02557
3.0644	2.18313	1.69299	2.06192
2.93208	1.94571	1.66287	2.40041
2.32842	1.71191	2.13663	2.40686
3.21412	2.88816	1.46292	2.25895
2.69658	2.43374	1.25266	1.88417
2.97603	2.67007	1.55505	1.5556
3.04527	2.25467	1.78229	2.0671
2.91114	3.20539	2.04572	1.48564
3.09107	2.23739	1.71278	1.7928
3.13437	2.38732	2.07922	1.76453
3.23527	2.91874	2.24179	2.21168
3.25626	2.03904	1.42988	2.04383
2.8964	2.24621	1.72916	2.10346
3.20603	1.62933	2.61619	1.5601
2.55336	2.98174	1.66721	1.99758
3.60672	2.90687	2.00709	1.64398
3.98622	2.08064	1.59412	1.74514
4.44952	2.55455	2.31953	2.4311
4.72067	2.82028	2.32795	1.73239
4.43779	2.36192	1.9912	2.02364
3.94143	2.05327	1.81422	2.27281
3.59607	2.67339	1.62233	2.54047
3.74958	2.42467	1.82852	1.65738
4.65444	2.8448	1.84736	1.52466
3.87445	2.06977	1.27715	1.67157
2.57304	2.15573	1.86103	1.45783
3.85169	2.4442	1.8034	1.25745
4.32555	2.79381	1.82853	1.87101
4.63344	2.78997	1.87631	2.42259
3.6722	2.95605	1.7305	1.52569
3.3889	2.20847	2.14814	2.4254
4.04973	2.38494	2.72805	1.41141
3.70154	1.88354	1.88609	2.10331
4.25523	2.85063	2.34519	1.38146
4.04895	2.49929	1.46439	1.93228
3.50107	2.12666	1.83851	2.01406
4.35481	3.08076	2.18356	2.4328
2.14647	2.1886	1.89121	1.63155
4.01715	2.84921	1.84604	1.65434
3.82968	2.51831	1.72063	2.6614
4.28073	2.6718	1.54145	2.0315
4.51404	1.89098	1.56254	2.48102
2.10851	2.39053	1.60046	2.65862
3.4274	2.43371	1.65219	1.9656
5.02328	2.36583	2.25345	1.93837
3.56392	1.60598	1.66852	2.53527
4.8556	2.37601	1.22581	2.17629
3.60492	2.67018	1.61049	1.65676
3.99914	1.99904	2.64239	2.82298
4.06547	3.24582	2.16068	2.29992
3.55685	2.05568	1.84605	1.38687
2.94576	2.98888	1.99737	2.07806
3.11663	2.30444	1.76378	1.88305
2.59015	2.02729	1.70061	2.70088
2.56217	2.06799	1.28172	2.16041
3.72489	2.35981	1.92792	1.67078
4.3715	3.27626	1.91722	1.63326
5.27865	3.05276	1.25122	1.77597
2.10149	3.0188	2.31435	1.35828
4.61098	2.22547	1.57586	2.12654
4.20383	2.09113	1.34138	2.76851
4.61351	2.61422	2.19775	1.83349
4.85169	2.3527	1.99209	1.28093
2.0103	3.00578	1.09028	1.72873
2.00974	2.98906	1.86715	1.3714
2.04504	2.76729	2.39679	1.89967
2.15377	3.0614	1.70485	1.8112
3.70293	2.525	2.56328	1.83035
2.05404	2.79545	1.77592	2.19384
2.36671	1.8055	1.4864	2.06741
2.20745	2.58687	1.25053	1.61868
2.08446	2.33565	1.14604	1.96587
2.79215	2.18112	1.48292	2.08225
4.33955	2.31019	1.83323	2.37721
2.98114	2.60866	1.66942	1.40766
2.75993	2.98433	2.19763	1.49217
3.17	2.66024	1.16647	2.52297
2.98276	2.69203	1.43051	1.83369
3.04427	3.18692	1.25168	2.51504
2.7728	2.68076	2.66331	1.55322
2.79594	2.69555	1.66832	1.94361
2.98224	3.10631	1.4785	1.58442
2.80756	1.8447	1.62143	2.16596
2.45129	3.18281	2.19047	1.9227
2.6857	2.89818	2.12374	1.37685
2.63011	2.68613	1.2456	2.33544
2.65394	2.80156	1.7207	1.2497
3.51852	1.9114	2.22307	1.45231
3.7092	1.95724	1.84213	1.40638
5.20612	1.9811	1.76293	2.1026
3.64666	2.94864	1.59932	1.66472
4.33484	2.53541	1.52529	3.53029
2.37482	1.94335	1.34997	2.83105
3.86857	2.17863	1.98031	2.08704
5.0071	2.67767	1.37223	3.36492
5.3559	3.04489	2.20277	1.84558
5.24777	1.95994	1.54656	2.00558
4.75929	1.93404	1.81952	1.50074
3.45704	2.52131	1.99898	1.86275
4.14453	3.17481	1.66422	2.46097
4.41019	2.05932	1.46723	2.64731
3.65898	2.72007	1.64975	1.93446
2.95738	1.904	1.91902	1.88563
2.42973	1.99667	1.61102	2.51814
4.24473	2.87999	1.76986	2.16954
2.59209	1.77875	2.08186	1.62294
3.61274	2.63634	2.27421	2.80853
4.95579	1.81844	1.8645	2.29748
4.24728	1.90331	1.34522	1.3316
2.52212	3.07306	1.89165	2.06432
6.744	2.70906	1.64311	1.85708
2.33709	3.26787	1.38439	2.69634
2.27441	2.2806	2.74682	2.18013
2.45742	2.9936	1.78744	1.6715
3.20768	1.98924	1.43268	1.64225
3.27932	2.01078	1.85108	1.72715
2.27385	2.36592	2.57999	1.34017
2.22131	2.83247	1.80522	2.12967
2.79543	2.33009	1.43292	2.77374
2.62749	2.09335	1.62874	1.81403
3.01987	2.26305	2.20755	1.25108
2.7228	2.722	1.79126	1.70496
4.56236	3.02994	1.49339	1.41881
3.39085	2.49119	2.02629	1.85049
4.40748	1.70269	1.80187	1.78529
4.0776	2.39246	1.33363	1.80797
4.3635	3.16353	1.93237	2.17974
3.75758	1.95914	1.80738	1.9944
4.28982	2.31765	2.445	1.94494
3.59455	2.06055	1.67721	2.05951
4.51825	2.02754	1.65832	2.36387
3.81487	2.58156	1.47043	1.52085
3.78745	2.00917	2.0764	1.93125
4.39621	2.16883	1.98337	2.49798
3.7268	2.7608	2.90931	1.8186
4.81352	2.50983	1.48539	2.51323
4.85746	2.42135	1.41353	1.52954
3.48667	2.44417	1.91186	1.92949
4.72714	2.78027	1.40264	1.54376
2.25922	2.0512	1.45301	1.88065
4.38916	1.95933	1.5005	2.11755
3.8487	2.69511	2.12809	1.35054
2.27809	2.20745	1.89415	2.32856
3.73868	2.25489	1.46524	1.24517
4.10432	2.36979	1.82591	1.48372
4.0224	2.55791	3.11515	2.0876
3.58474	2.65608	1.59899	1.63711
3.35167	2.85527	1.61091	2.04169
2.48309	3.03173	1.94188	1.512
2.69385	2.59211	1.43009	1.51916
5.88737	2.30801	1.6003	1.36307
2.50901	1.63928	1.29938	1.6179
2.48873	2.94381	1.26451	1.69819
3.51994	1.80954	1.09609	1.9156
3.6129	1.90348	1.44696	1.48992
2.8734	2.06245	1.92378	1.60188
3.24209	2.42052	1.79432	1.31763
2.91999	2.59125	1.34415	1.86745
2.95755	2.11847	1.80506	1.55783
3.12954	2.29986	1.41023	1.50716
2.4224	1.94259	1.79662	1.93924
2.90045	3.12414	1.94154	2.14201
3.82096	3.28726	1.81047	2.18247
5.22799	2.30434	2.24235	1.84696
4.07047	3.0642	2.16479	1.42173
3.13389	3.07804	1.83741	1.64615
3.8451	2.79244	1.24526	1.70231
4.26213	2.30435	1.96312	2.06533
4.04655	2.93948	1.97944	2.33397
4.09189	2.08874	1.86129	1.33525
4.47143	1.65306	1.76	1.54192
4.72638	2.46633	1.66315	1.46394
2.95817	1.58467	2.31296	1.93956
2.87864	3.13955	1.32442	1.70726
3.97124	2.26516	1.29504	1.41801
3.92203	2.31483	1.7525	1.27209
4.25288	2.32874	2.10233	1.60483
4.62712	2.37074	1.35243	1.90121
2.83852	3.30086	1.37375	2.33611
3.66201	2.30514	1.28148	2.2178
3.88057	2.90248	1.91562	2.32972
3.97135	2.26861	2.22014	1.89616
3.9395	1.56868	1.55961	1.6321
4.01361	2.65934	1.74149	1.80092
4.58907	2.03155	1.36005	2.26977
3.63451	2.31883	1.86141	1.58767
3.04013	2.91878	1.41672	1.57791
2.85652	2.93428	2.27675	1.47344
4.73549	1.57085	1.3684	2.14038
3.95756	2.65049	1.75212	1.87246
2.44887	2.27983	1.77875	2.28498
2.60193	2.80721	1.84638	2.01605
2.6285	2.06396	1.49032	1.94862
2.0377	3.30464	2.13247	1.52783
3.2452	2.82575	1.49599	2.01453
2.36274	2.17267	1.4011	2.28273
2.37911	2.8703	2.19072	1.92485
3.49526	1.78227	1.4436	1.29793
3.35022	2.60263	2.11944	2.33555
3.11826	3.25856	2.33753	1.65739
2.49367	2.14421	2.17185	1.59434
2.60433	2.05134	1.45326	1.46423
2.42222	1.79874	1.53992	2.00169
3.05437	3.12257	1.53215	2.9543
3.0763	2.30357	1.56303	1.7855
3.16277	2.58941	1.40167	1.25613
2.19832	1.62476	2.34005	2.46689
2.784	1.49823	1.26705	1.35453
2.46216	2.44471	1.93735	2.65206
3.04478	1.72344	2.02947	1.81379
3.08098	2.0021	1.54379	2.37882
3.32695	2.04249	1.96011	1.56752
3.22849	1.68413	2.07795	1.49991
2.62963	3.28667	1.43532	1.57154
2.82213	2.73836	1.39823	1.45759
3.76633	2.29822	1.67769	1.9086
3.7588	2.85202	1.44613	1.48809
4.58995	2.35026	1.72574	1.48979
3.59148	2.0065	1.4778	2.0272
4.5795	2.06868	1.88045	1.52699
4.06684	2.32011	1.76121	2.73726
3.36422	2.19769	1.48469	2.4493
4.78153	1.88459	1.69766	1.98195
4.08241	2.41775	1.35188	1.43276
3.40852	2.68347	1.73353	2.2132
3.43347	2.27091	1.77962	1.45957
4.13524	1.90335	2.12301	1.41866
4.00013	3.00253	1.26032	3.21854
3.92803	2.17024	1.38467	1.79074
4.39806	1.62982	1.78431	1.87204
4.23494	2.10437	1.28064	1.90288
5.31304	2.37075	1.70413	2.47367
4.57026	2.16398	2.26527	2.27032
3.74467	2.67514	1.30361	1.91148
4.17157	1.86805	1.59749	1.74738
4.44561	2.3501	1.62234	1.49639
4.40439	1.80973	1.8576	2.3311
2.36065	2.20043	1.95064	1.8122
2.37409	2.54944	1.65481	2.19168
4.47541	2.4933	2.19647	1.782
4.04022	1.53411	2.03484	1.67907
3.07827	2.79114	1.44362	1.3552
3.19006	2.02658	1.56337	2.08613
3.32394	2.78136	1.90909	2.03516
2.82489	1.85495	2.57817	1.39394
2.55633	2.1282	1.41532	3.15324
3.28951	1.78098	1.564	1.28491
3.18567	3.28444	1.46666	1.3833
3.46751	1.99062	1.99022	1.44462
3.54881	2.70466	1.46923	1.3016
4.91507	2.43444	1.31424	1.03533
3.7609	1.01965	1.33301	1.38374
3.82053	2.6864	2.1627	1.36427
3.98469	1.92335	2.08331	1.34591
4.66853	3.0343	2.19733	1.12869
4.38853	1.95435	1.90663	2.02326
3.9891	2.34931	2.37168	2.03489
3.33405	2.62532	1.43215	3.07522
3.75653	2.66385	1.96916	1.34928
4.51357	3.23563	1.6086	1.35187
4.93321	1.72832	2.87281	1.66744
4.49329	2.45768	1.81851	2.19712
5.12405	2.14172	1.91533	2.34061
2.60015	2.08817	2.61177	1.88454
2.62642	1.76215	1.56036	1.52446
2.38693	2.10152	2.06465	2.13359
2.36804	2.10099	1.45169	2.9512
2.69812	1.78389	2.01932	1.80201
3.26826	2.49565	1.52609	1.76925
2.81298	2.54268	2.06374	1.75202
3.18974	2.44321	1.59603	1.64637
3.14945	1.9462	1.65363	1.63897
3.01465	3.29911	2.07728	2.11004
2.45606	2.60774	2.18634	3.27033
2.9131	1.97734	2.02924	1.63009
2.97991	1.51315	1.56084	1.70872
2.87325	3.29946	2.18278	2.29118
2.9042	2.26648	1.6524	2.08897
2.6448	2.55193	1.74862	1.14048
2.58679	1.92235	1.90184	1.55201
3.23993	2.64005	1.90003	2.04918
3.16189	2.97586	1.2144	1.62521
2.4602	1.98137	2.57637	1.69003
3.08569	2.277	1.78992	1.28096
3.12056	3.29241	1.69196	1.55733
2.849	2.64845	1.99999	1.48992
3.01919	2.03805	1.65462	2.04599
2.87318	1.67077	1.36846	1.63595
3.37454	2.5939	1.26073	1.42617
3.79346	3.2024	1.97478	2.84253
2.84458	2.52249	1.29695	1.28044
2.55167	1.76554	2.04738	2.51575
3.42166	1.98348	1.95515	1.64185
3.93436	2.36742	2.64742	1.87824
5.14956	2.80103	2.06395	1.3669
3.35046	2.45385	1.8226	1.60164
4.03249	2.89973	1.34701	1.9166
3.64279	2.896	2.23459	1.57785
4.44168	2.5286	1.53147	1.75563
4.42143	1.60338	2.12004	1.87406
4.9752	2.79061	2.05072	1.59042
3.70625	2.16548	1.70253	1.17655
5.41858	3.1242	1.31364	2.24871
4.52626	1.52813	2.09538	2.34206
4.75008	2.21643	1.86003	1.93394
4.36246	3.18151	1.50818	2.25204
5.81376	2.26244	1.2043	1.37655
3.61187	3.07131	2.07849	1.93069
4.04417	2.81156	1.5121	1.78225
4.35013	1.78376	2.98306	1.55491
3.26135	2.35557	1.76168	1.93638
2.19271	2.75334	1.80277	1.60847
2.18882	2.96844	1.68447	1.36442
2.32845	3.20721	2.22402	1.48075
2.27275	2.17589	1.55406	2.39356
2.23261	2.74558	1.37941	2.49404
2.30776	1.76928	1.40902	1.88128
2.5089	1.65008	1.55036	1.50401
	2.54398	2.31121	2.3698
	2.69965	1.21999	1.874
	1.73985	2.1029	1.25509
	3.23473	1.84567	1.92396
	2.10273	1.48284	1.37762
	2.3044	2.23549	2.16005
	2.05914	2.1924	2.372
	2.40256	1.64007	1.93775
	2.15676	1.49988	1.85228
	2.62411	1.22368	1.7867
	3.0869	2.85501	2.21138
	2.24091	1.88203	2.46248
	2.58337	1.88229	1.62213
	2.66299	1.85445	1.32929
	2.39418	1.81156	1.75316
	2.25824	1.64379	2.22128
	3.00055	1.93308	1.80823
	2.07526	2.45255	1.56603
	1.73097	1.8648	1.91139
	2.17033	1.27762	1.69396
	3.06493	1.75908	2.20521
	2.42916	1.59239	2.14798
	2.94999	2.05348	2.01623
	2.84791	2.08342	2.28304
	1.86813	1.73498	2.33055
	2.16862	1.39662	1.82454
	3.06002	1.97835	1.74628
	2.76368	1.83365	1.27759
	1.95717	2.36087	2.07434
	2.22556	1.31745	2.12177
	1.98331	1.92689	1.71552
	2.70813	2.54595	2.13605
	1.93388	1.63964	1.4476
	2.53469	1.10586	1.50803
	2.80568	2.09129	2.7258
	2.23549	2.02355	1.29791
	2.56887	1.12393	1.32686
	2.27483	1.82638	1.77154
	2.47675	1.93707	2.21278
	2.37506	2.30544	2.96842
	1.94868	1.67046	1.1944
	2.60298	2.08171	1.52326
	2.24905	1.67073	1.95956
	2.98763	1.79584	2.14914
	2.63176	1.91753	2.49553
	2.21	1.94874	1.30781
	1.77573	2.60598	2.69551
	1.94428	1.45603	1.85402
	2.69071	1.50339	1.39517
	2.48858	1.51631	1.45044
	2.21262	1.70377	1.74551
	2.2013	2.76347	1.51077
	2.57011	2.03934	2.14742
	2.09898	1.76359	1.61109
	2.83998	2.27595	1.49022
	2.49026	1.65862	2.29375
	2.70894	2.20586	1.66145
	3.28664	2.02906	1.70622
	2.35468	1.52696	2.44932
	2.07811	1.75789	1.82598
	2.21635	1.63745	1.81735
	2.27881	2.33138	1.4083
	2.20573	2.07866	1.88499
	3.29351	1.19668	1.96776
	2.27073	1.4643	2.28071
	2.57552	1.48247	1.43216
	2.51967	2.25973	2.3227
	2.29106	1.96821	1.50471
	3.24019	1.88004	1.54839
	2.76856	1.97936	2.3427
	3.22605	1.18845	2.14846
	1.94912	1.77158	1.47694
	2.65755	1.21174	1.78879
	2.54859	1.86852	1.75614
	2.16955	1.57107	2.22908
	3.3085	2.22526	3.62266
	2.81997	1.52016	1.84735
	2.47546	1.2691	1.35534
	2.33127	1.3223	2.00847
	2.58105	1.52416	1.9282
	1.99576	1.99447	2.18549
	3.31192	1.65484	2.18675
	2.71556	1.23221	1.33662
	2.71432	1.16117	1.98022
	2.8725	2.57019	2.34481
	2.27096	1.35822	2.3389
	2.45835	2.37415	1.31999
	1.76768	2.72177	1.64884
	2.87206	2.3762	3.008
	2.58283	2.46842	1.58551
	2.26985	3.55614	1.46581
	2.58175	3.34406	1.77863
	2.24336	1.40384	2.49992
	1.85068	1.4712	1.17756
	1.68742	2.00664	1.76194
	2.07724	1.76684	1.5702
	1.89109	2.02746	1.52937
	2.65623	1.48304	3.07035
	2.20144	1.44502	1.66611
	1.98851	1.92831	1.30227
	2.18675	1.53189	2.27453
	2.06505	1.76875	1.81945
	2.9341	2.18774	1.37791
	2.70118	1.45796	2.11042
	2.97631	1.96149	1.31326
	1.6832	1.82483	1.66695
	2.1321	1.73563	1.35836
	1.96223	2.41934	1.80868
	2.81883	1.51916	1.54727
	2.27112	1.49568	1.95403
	2.24928	1.26706	2.01431
	3.28867	2.74919	1.55513
	2.4209	1.7637	2.24804
	2.65018	1.07964	2.42373
	2.77926	2.84972	2.36801
	2.5075	2.02713	1.40799
	2.99099	1.31336	1.72624
	2.25246	1.26661	1.93567
	2.39928	1.32427	1.52083
	2.47402	2.0261	2.02521
	2.3747	2.24913	2.63279
	1.98412	1.9068	1.99573
	1.66844	1.36989	2.12929
	2.28136	1.60826	1.55445
	2.23858	1.45542	2.05341
	3.03849	1.31275	1.51634
	2.45919	1.70267	2.25591
	2.46245	1.64755	1.50164
	2.23155	1.27357	1.96985
	2.68143	1.79498	1.69586
	2.86898	2.05596	1.67226
	3.26689	1.59665	2.12372
	1.64978	2.02882	1.62387
	2.07462	2.27088	1.47645
	2.75949	1.91407	1.55023
	1.90657	1.85567	1.34412
	1.96134	2.08801	1.76571
	3.2287	2.13656	1.28977
	3.09863	2.19154	2.50615
	2.25081	1.58244	1.55844
	2.81031	1.28932	1.60801
	2.45501	2.09692	2.68768
	1.82762	2.15138	1.96922
	2.80618	1.84344	2.04126
	2.04893	1.81957	1.81557
	2.50668	2.27028	1.47392
	1.95952	2.16352	1.78852
	2.12454	1.53183	2.73385
	2.48988	1.16682	1.92067
	2.71796	1.5037	2.27052
	2.37249	1.76921	1.43952
	3.04435	1.77156	2.45558
	2.65166	1.80029	1.56417
	2.34112	2.09486	1.28657
	2.05923	1.29795	1.73152
	2.87373	1.21127	1.8763
	1.92462	1.74543	1.62946
	2.35632	1.439	1.29839
	1.67237	2.20949	1.55924
	2.59858	1.89203	2.35319
	2.59458	1.16544	4.27662
	1.84403	1.18851	3.82616
	1.53803	1.64353	2.33902
	3.72309	1.14681	1.3428
	3.48089	1.45831	1.565
	3.53293	1.87138	1.76495
	3.51092	2.28961	1.33964
	3.31553	2.05689	1.71393
	3.81882	1.22348	2.04613
	3.45128	1.66293	1.42542
	3.41003	2.73213	1.77951
	3.51547	1.06535	2.65784
	4.05935	1.90292	1.67078
	3.3302	1.27431	2.39276
	3.4599	2.28767	1.41192
	4.69377	1.30256	1.7845
	3.89417	1.27259	1.91334
	3.55949	2.08368	1.96934
	3.74885	1.8845	1.56255
	3.40694	2.20447	1.41474
	3.98216	1.61476	1.85347
	3.51647	1.86355	2.05407
	3.73289	1.51914	2.57206
	3.40855	1.36699	1.50189
	4.22389	1.55495	1.5133
	3.75127	1.23362	1.98844
	3.55815	1.32851	1.62718
	3.49942	1.87492	2.63316
	3.50106	1.64518	1.38255
	3.45737	1.8488	1.37175
	3.84198	1.5259	1.39367
	3.77898	1.92721	1.32821
	3.45786	1.52487	1.85434
	3.46402	1.69849	1.43832
	3.42078	1.89866	1.4033
	3.55059	1.47778	1.78383
	3.72144	2.33934	1.76473
	4.03791	1.91792	1.19224
	4.09229	1.37504	1.99016
	3.63064	1.9143	2.0075
	3.53958	1.8493	3.06044
	3.63924	2.14571	2.44885
	3.50419	1.43149	2.0957
	3.33121	1.37952	1.6561
	3.36248	1.98533	1.2396
	4.15993	1.24826	1.34974
	3.476	2.17375	2.21698
	3.68245	1.06021	1.24948
	4.48844	2.2063	2.25531
	3.39114	1.51519	2.04105
	3.72562	2.60721	2.06508
	3.37163	2.05724	1.83911
	4.07031	1.41897	2.1129
	3.49593	1.70288	1.51477
	3.39252	2.05031	1.90326
	3.45908	2.40974	2.26742
	3.57311	2.04626	1.93488
	3.47465	1.1646	1.62159
	3.4579	2.03997	1.9653
	3.40269	1.96841	2.18911
	4.21179	1.50715	1.80902
	3.38229	2.00881	1.94175
	2.12547	1.53474	1.66209
	2.16104	1.90772	2.69692
	5.33395	1.4324	1.93646
	3.79935	1.10935	1.74331
	3.52025	1.69709	2.13261
	3.73981	1.80486	1.60124
	4.41789	1.42809	2.00951
	3.67513	1.64759	1.52151
	3.69384	2.76722	2.13774
	3.56957	1.76666	1.52072
	3.59465	1.79212	1.67993
	2.2023	2.20308	3.16538
	3.40767	2.24604	1.44093
	2.80829	1.50679	1.64102
	3.12476	1.87048	1.65169
	2.85133	1.44728	1.4167
	3.10613	1.16739	1.32207
	3.07316	1.00568	2.01521
	2.68759	2.78493	1.87092
	2.86017	1.72605	1.55071
	2.15754	1.79299	1.7333
	3.40546	2.35879	2.48432
	2.07442	1.97349	1.47336
	2.78884	2.0446	1.4869
	3.4435	1.77593	2.14568
	4.09494	2.32546	1.65353
	4.08141	1.9066	3.17035
	4.05046	2.20944	1.44565
	3.8457	2.01258	2.0608
	3.63664	1.95755	1.77687
	3.57318	1.67865	2.02053
	3.78455	1.45971	2.02154
	3.815	1.28494	1.38369
	2.12646	1.48962	1.26609
	2.30961	2.47455	1.92515
	4.42401	2.42845	1.94704
	4.50954	1.60996	1.52946
	3.68085	1.38958	1.73262
	4.48518	2.03982	1.36994
	4.02108	1.3513	1.41303
	3.66204	1.62315	2.19411
	4.70972	2.13413	1.1874
	1.82496	1.3906	1.94977
	1.84517	1.81465	2.07184
	4.32392	1.9518	1.96594
	3.72109	1.46715	1.17821
	4.40336	2.48014	1.37584
	4.00576	2.04628	1.44549
	3.89713	1.9336	1.99244
	3.37438	2.207	2.33175
	4.64919	1.87103	1.48932
	4.20057	2.02524	2.25301
	3.75338	1.6371	1.70858
	3.32894	2.0156	1.41334
	3.40377	1.37955	1.46092
	3.81336	1.65979	1.12808
	3.37752	2.00485	2.41839
	3.73316	1.56352	1.89753
	3.39331	1.93668	2.0829
	3.4228	1.63556	1.45958
	3.86794	1.18123	2.22803
	3.47966	1.69717	1.77967
	14.8352	1.71888	2.16999
	3.55941	1.6592	2.21981
	3.51038	1.37992	1.47023
	4.08419	1.90479	1.22139
	1.92041	1.55964	1.96896
	2.05657	1.98164	1.43701
	4.38255	2.05857	2.20701
	1.70478	1.3194	2.72909
	1.88776	1.59657	1.6615
	1.72629	2.07306	1.87656
	3.58813	1.76128	2.42443
	3.72674	1.67479	1.45147
	3.62947	1.95253	1.70506
	3.68577	1.40248	1.49662
	1.97216	1.41481	2.05627
	3.74604	1.63918	1.55677
	1.52602	1.78384	2.03203
	1.55315	2.17732	1.51004
	1.53578	1.50203	1.78203
	2.27806	1.52184	2.63226
	1.80451	1.26335	2.8192
	2.37373	1.84925	2.12262
	2.70787	1.89186	2.05556
	2.25456	1.5583	1.66705
	3.12279	1.68296	1.94243
	3.1412	1.69276	1.92149
	1.70446	1.63632	1.75923
	2.69485	2.13111	1.28318
	1.93912	1.45653	1.94494
	1.99435	1.20952	1.58555
	3.11993	1.53939	1.45821
	2.41055	1.77904	2.72918
	2.29795	2.04446	1.33088
	2.25286	1.65714	2.52854
	2.9535	1.34342	1.96937
	2.60461	1.99834	1.30644
	2.13281	2.21924	2.89611
	2.85594	1.76626	1.71547
	1.74654	1.42934	2.18378
	2.76354	1.702	1.66998
	2.9951	2.51089	2.58804
	2.23325	1.71998	1.67542
	2.52961	2.65379	1.33536
	1.68857	2.43025	1.1841
	2.31548	1.59696	1.83734
	2.29851	1.99618	2.62418
	2.62126	1.54473	2.59934
	2.60692	1.11921	1.83987
	2.10525	1.74248	1.68435
	2.27855	2.30861	2.08174
	2.30334	2.23872	1.44651
	1.66691	1.95919	1.24512
	1.98495	1.79229	1.26498
	2.94483	1.58539	1.24735
	3.08702	1.76514	1.72754
	1.6703	1.8067	1.49802
	2.86154	1.24956	1.97663
	2.37113	1.83672	1.52699
	2.34158	1.3295	1.59724
	2.30216	1.85179	1.39879
	1.93384	1.32401	1.41547
	1.90218	1.8432	1.7601
	2.82863	1.85739	2.09644
	2.67882	1.70134	1.74453
	2.64194	2.14883	1.64215
	2.19708	2.70887	2.00126
	2.89354	1.84919	1.68251
	2.36206	2.32373	1.66953
	2.30957	1.42412	2.13337
	2.07917	1.79743	1.5995
	1.95321	2.1744	2.02426
	2.94632	1.85316	2.67589
	1.54622	1.72162	1.62469
	2.25691	1.50258	1.54524
	2.49862	1.53194	1.39168
	1.8814	1.559	2.93235
	2.67645	1.65321	1.86358
	2.38362	2.24701	2.37407
	1.89764	1.64116	2.44702
	1.78675	1.6134	1.88703
	2.2732	1.19856	1.68328
	3.07646	2.65416	1.86115
	2.17273	1.82202	2.41285
	2.23533	2.17891	1.37815
	2.23085	1.93598	1.36876
	2.38359	1.67686	1.58657
	2.49455	1.68533	1.75121
	2.85933	1.28166	1.42863
	1.86989	1.89797	1.82874
	1.69572	1.23106	2.1967
	2.19535	2.28926	1.44335
	2.20965	1.53581	1.40623
	2.25793	1.34631	2.45955
	2.35006	2.17669	1.99874
	1.547	1.98677	1.37999
	2.74004	1.09841	1.85669
	3.05413	1.79205	1.57372
	1.63876	2.30946	2.43353
	2.86856	1.69719	1.64331
	1.86147	1.8163	1.50219
	2.84457	2.55602	1.60483
	2.056	1.45013	2.16284
	2.80592	1.2509	2.15933
	2.26011	1.11148	1.58659
	2.63501	1.41999	2.02489
	2.81381	1.79418	1.67992
	2.52287	1.61896	1.10518
	2.12691	2.16502	1.49958
	2.2916	1.12064	1.57841
	2.34746	1.39286	1.4187
	3.04552	1.25825	1.77825
	3.03849	2.62283	1.99557
	2.75198	1.62186	1.98816
	2.848	1.4317	1.71882
	3.10535	2.15762	1.68698
	2.01412	1.64011	1.35758
	2.38183	2.14476	1.60841
	1.83479	2.09229	2.0681
	2.67924	1.27245	1.58949
	2.42945	1.72134	1.38827
	2.71072	1.68952	1.31946
	2.54155	2.22191	2.72379
	2.19693	1.83361	2.59889
	2.74251	1.57221	1.47233
	1.9435	1.5031	1.741
	2.35638	1.96746	1.27584
	2.15832	1.32546	1.75174
	2.76419	1.34868	1.64667
	2.22927	2.20138	1.64293
	1.99735	2.24093	2.43043
	2.0342	1.47189	2.0574
	2.68537	1.51995	2.34445
	2.17855	1.74658	1.87611
	2.77806	2.01374	2.13595
	2.19531	1.64182	1.73975
	2.39243	1.14675	2.33297
	2.278	1.44421	1.8161
	3.09381	1.64693	1.94237
	2.99889	1.90352	1.2833
	1.84493	1.60508	2.45402
	2.64563	1.76002	1.44362
	2.28494	2.14043	2.01356
	2.59954	2.04825	1.6535
	1.74682	2.2184	2.58527
	2.26887	1.85288	1.7967
	2.78866	1.34892	1.50258
	3.27931	1.88655	1.44412
	2.37058	1.36426	1.61769
	1.67083	1.57947	1.66724
	2.03059	2.76873	1.93298
	1.81656	1.75165	1.8636
	2.00119	1.38869	3.06816
	3.09101	1.85541	1.46569
	2.43406	1.38957	1.46697
	2.18163	2.11734	1.51863
	1.86012	1.76631	2.49344
	2.00299	1.48624	2.42891
	2.09608	1.7582	1.77912
	1.99321	1.27018	1.3026
	2.51365	1.92182	2.18036
	2.70168	1.78375	1.55714
	3.14996	2.44626	2.36647
	2.88323	1.40891	1.47828
	3.09535	2.07274	2.06106
	2.67739	1.9408	1.31585
	3.17371	1.48803	2.38701
	2.45125	1.36881	2.36776
	3.14559	1.9283	1.2396
	2.61087	1.55438	1.37478
	2.94758	1.37939	1.63648
	2.26992	1.39483	1.15416
	2.17508	1.48038	2.0499
	2.54732	2.14257	1.78754
	2.3237	1.85428	2.55688
	2.19231	1.41783	2.04994
	3.05266	1.80503	2.27625
	1.89264	3.16075	1.76315
	3.10575	1.79097	1.77493
	1.90352	1.5501	2.78067
	2.8456	2.94755	1.41482
	3.24947	1.59995	2.29862
	2.41784	1.91544	1.35826
	2.0077	2.01251	1.36264
	2.61531	2.03156	1.47952
	2.32972	1.91829	1.89537
	2.07361	1.39661	1.61888
	2.84517	1.61252	1.58536
	2.49752	1.26823	1.77825
	2.44268	1.49083	1.88031
	3.21052	1.63825	1.7581
	2.02989	1.22456	1.20514
	2.30367	1.21058	2.73332
	1.88155	1.10375	1.61792
	2.8581	1.44261	1.71702
	3.07448	1.86871	1.57942
	2.32821	1.72007	1.93744
	3.70182	1.32598	1.89412
	3.32642	1.31542	1.4816
	3.50118	1.76438	1.50091
	3.97909	1.38199	1.99692
	3.32005	1.75596	2.49616
	3.69012	1.96116	1.62453
	3.78458	1.93644	1.72138
	2.0368	1.88524	1.49858
	3.38905	1.76531	1.886
	4.10579	1.75315	1.24332
	4.05331	2.23434	2.31247
	3.45007	2.10906	1.5471
	3.78181	1.82698	1.85038
	1.93055	1.18111	2.14064
	3.40491	1.1479	2.45721
	3.99289	1.33971	1.31478
	3.36852	1.88199	2.4278
	3.63246	1.45218	1.32867
	3.70127	1.92355	2.62834
	4.53651	1.60344	1.4776
	3.8407	2.38388	1.47409
	3.42224	1.84367	1.5946
	3.47462	1.68387	1.49569
	3.88421	1.58459	1.28835
	3.55289	2.27725	2.1598
	3.35457	1.24932	1.75406
	3.24191	1.26761	1.91414
	4.16313	1.82486	1.50073
	3.36396	1.23859	2.60649
	4.24571	1.7095	2.75103
	4.36433	2.09913	1.35191
	2.21183	1.37359	1.55813
	2.08378	1.36027	1.38459
	4.20317	1.02176	1.55552
	3.90202	2.35063	1.62902
	3.72556	1.28185	1.98368
	3.81918	1.88732	1.13043
	3.51466	2.19535	2.07891
	4.05199	1.5236	2.14352
	3.72746	1.71627	1.25537
	1.84178	1.77176	1.53043
	2.1099	1.32384	1.59188
	2.68023	1.7957	1.95996
	1.83272	1.81966	1.59918
	2.88326	1.67579	1.3689
	2.9237	1.39685	3.01355
	2.25602	2.2439	1.47914
	2.91247	1.32795	1.83066
	2.45386	1.68761	2.34221
	2.21957	1.26343	1.47159
	1.87983	1.23295	1.81721
	3.30381	1.76532	1.29863
	2.29261	2.10937	1.42071
	2.83371	1.49244	1.56544
	2.71628	1.82843	2.13718
	2.84813	1.44623	1.65352
	1.96363	2.10433	1.60728
	2.98599	1.46538	1.96037
	2.78641	1.37945	1.8365
	2.75401	2.19423	2.4594
	1.59963	1.44912	1.46915
	1.55793	2.07925	1.92976
	2.52052	2.32352	1.40397
	2.67971	2.16777	1.54863
	2.69862	1.38566	1.53692
	2.02852	1.4895	1.59244
	3.22017	1.51208	1.47293
	1.88233	1.53427	1.4099
	2.30725	1.45029	2.42728
	1.76997	1.37776	2.18899
	2.82283	2.30371	2.2932
	2.0544	1.23938	2.522
	2.71017	2.01208	1.61015
	2.80415	1.50358	1.86222
	2.20422	1.9118	1.67654
	2.19196	1.93455	1.41005
	2.14247	2.0317	1.91459
	2.24325	1.42854	1.73021
	2.47193	1.41422	2.92332
	2.29802	1.62584	1.48377
	2.34517	1.39543	1.6607
	2.09679	2.42043	2.36511
	1.90682	1.68385	2.46648
	3.21813	2.64034	1.93669
	2.43262	1.47113	1.44849
	3.1359	1.84642	1.25855
	1.94777	1.72151	1.91514
	1.53399	1.47657	1.76345
	1.55031	1.67963	1.67209
	2.88984	1.35247	1.63641
	2.72509	1.73247	1.678
	3.13064	1.7784	1.96511
	3.14314	2.08789	1.14174
	1.49681	1.23969	1.90607
	2.63022	1.36318	1.26095
	3.22557	1.73556	2.14076
	2.87724	1.28866	2.44804
	2.63068	1.68125	1.76772
	2.36663	2.24099	1.35422
	2.87522	1.59033	1.35047
	1.62869	1.2606	1.64098
	2.84376	1.48017	2.06103
	2.37337	1.59302	2.03207
	2.02367	1.83445	1.39203
	2.79788	1.87899	1.56005
	1.68244	1.51843	1.50987
	2.61637	1.65398	1.5789
	1.8689	2.01371	2.1722
	1.92183	2.16585	1.33907
	2.65518	1.41753	1.37882
	1.66375	1.83928	1.58548
	2.25476	1.55295	1.80431
	2.73109	1.87177	1.83084
	2.07832	1.65207	2.31847
	2.58343	1.42171	2.65247
	2.92485	1.41128	2.11561
	2.47633	1.54314	1.85474
	1.97094	1.46072	1.59799
	2.40263	1.90864	2.01882
	2.09219	1.42766	1.71106
	3.14139	1.2961	1.85294
	3.09914	1.31812	1.46464
	2.33125	2.1506	2.13287
	2.0725	2.0795	1.44573
	2.04641	2.19927	1.92752
	2.16451	2.37448	1.69488
	2.81543	1.90743	1.71706
	2.35863	1.43185	1.30643
	2.47264	1.93361	1.85982
	2.72453	1.57359	2.23415
	2.73183	2.86873	1.44785
	1.84428	1.84347	2.04527
	2.50663	1.92498	1.29999
	1.98218	2.61743	1.82868
	2.15769	1.50012	2.7855
	2.48667	2.05022	1.18581
	2.2981	1.4307	1.69457
	2.83659	1.52991	1.26762
	2.38675	2.09198	1.65426
	2.2285	1.53869	1.85947
	2.87652	1.65244	1.81882
	2.77501	2.34504	1.91359
	2.15606	2.32783	1.89399
	2.1436	2.69746	1.44592
	3.29672	2.35559	1.43462
	2.62352	2.54291	1.80608
	1.78796	2.066	1.49249
	1.92427	2.73797	1.63287
	2.03482	1.88859	1.75242
	3.26756	1.89583	1.7966
	2.01683	1.75105	1.55991
	3.11065	2.53379	2.20852
	2.13264	1.59132	2.0368
	2.93816	1.56504	1.78388
	3.16124	1.42938	1.72258
	1.96072	1.99741	2.33347
	3.03901	1.30385	1.38324
	2.74582	1.39492	2.15846
	2.5839	1.77177	2.06803
	2.9174	1.66552	3.45211
	2.22117	1.86368	1.48758
	3.20091	1.6609	1.26563
	2.34507	1.34416	1.1649
	1.98498	1.15207	1.35205
	1.84893	2.12288	1.44121
	1.85337	2.07033	2.0255
	2.82019	1.30678	1.47547
	3.07048	1.88519	1.6313
	2.37167	1.83675	1.73701
	2.02482	2.48624	2.24182
	1.85965	2.52353	1.87552
	2.14401	1.52548	2.21471
	2.44837	1.83068	1.82658
	1.95063	2.1405	1.25601
	2.09164	1.58449	1.46061
	2.05598	1.89052	1.69825
	3.1601	2.20746	1.55838
	2.81466	1.86508	1.55169
	2.00812	1.81285	1.52426
	2.49165	1.9225	2.9574
	2.67854	1.74596	1.62103
	2.81298	1.94475	2.17502
	3.03822	1.79245	1.98464
	2.60266	1.63688	1.59622
	3.10183	1.45654	1.40071
	2.45483	2.1684	1.85477
	2.89557	1.63096	1.1968
	3.21437	2.03128	1.53399
	2.2045	2.13006	2.12255
	3.07988	1.44226	1.65797
	1.9958	2.60062	2.29071
	2.3952	1.83526	1.88171
	2.13559	2.34908	2.91236
	2.40576	1.77238	1.83102
	2.27619	1.66268	1.61616
	1.997	1.71919	2.37092
	3.08742	2.1968	1.86827
	2.20206	1.29953	1.71377
	2.64398	2.14873	1.9225
	2.37196	1.21837	1.86526
	3.03849	2.0139	1.44379
	1.9953	1.35772	2.08971
	2.84504	1.83047	2.02945
	1.88428	1.84671	1.97047
	2.3106	1.88461	1.73525
	2.89561	1.7212	1.83593
	2.68533	1.26392	2.03716
	2.6599	1.94251	2.50891
	2.30209	1.80547	2.37077
	3.22096	1.25085	2.05637
	2.36253	1.66371	1.59819
	2.14824	1.50149	1.41866
	2.64421	2.0106	1.74798
	2.43299	1.5275	1.68862
	1.95706	1.59886	1.64668
	1.9274	2.1095	2.55699
	2.91059	1.52029	1.35664
	3.12041	1.51387	1.40173
	2.11305	1.8186	1.96135
	1.82102	1.53309	1.45216
	3.07191	1.69455	1.54064
	2.32101	2.17973	1.61224
	2.58786	1.64785	1.24826
	2.82444	1.36883	1.57154
	2.45515	1.98923	1.72748
	2.01323	1.79709	1.21287
	2.7479	1.30274	1.82676
	2.07361	2.3109	1.58247
	2.58309	1.6008	1.75172
	2.08414	2.27191	1.95097
	2.1216	2.42246	1.87386
	2.43938	1.63745	1.30878
	2.07149	1.72115	1.97527
	1.81781	1.28887	2.01498
	1.92802	1.62688	1.82387
	3.41989	1.76157	1.71308
	3.58665	2.57938	1.40089
	3.58331	2.34216	1.43161
	3.69039	1.67183	2.77232
	3.82073	1.97885	2.25101
	3.99359	1.09792	2.38809
	3.37804	2.07593	1.47988
	4.1324	2.34763	1.79398
	3.63013	1.92365	1.34589
	3.74173	1.34726	2.53739
	3.5472	1.6167	1.60326
	3.79763	2.35061	1.87984
	2.08692	1.20749	1.18807
	3.70177	2.02453	2.00549
	3.49823	1.40071	2.14674
	1.87316	2.09642	1.42377
	3.57251	1.91858	1.51797
	3.41096	1.42769	1.29238
	3.42002	1.58346	2.51204
	3.70119	1.68418	1.41118
	4.36327	1.70869	1.38998
	3.36426	1.70889	2.17107
	4.03445	2.06338	2.35663
	3.52284	2.83279	2.12256
	3.63361	2.13644	1.50793
	3.62889	2.02627	1.76496
	2.8466	1.50681	1.7791
	3.23435	1.58663	1.32289
	3.27847	2.38644	1.7704
	3.30692	2.16169	1.58729
	3.16971	1.73583	1.66765
	3.05285	2.32125	1.8943
	3.71592	1.99424	1.44789
	4.46871	1.36098	1.72591
	4.02865	1.28908	1.36656
	3.93671	1.97488	1.84893
	2.12253	2.12825	1.37172
	2.16077	1.40035	1.80137
	4.15935	1.60942	2.23133
	2.0533	2.04625	1.79887
	1.90274	1.77663	1.8059
	1.8193	2.87607	1.74201
	7.15066	1.7836	2.18502
	3.8333	2.00968	1.4911
	3.4899	1.86481	1.18763
	3.77989	2.07337	1.2564
	1.70019	2.30525	1.20545
	1.84358	2.12788	1.84807
	4.49159	2.00457	1.37902
	4.17062	2.13409	2.56
	3.78338	2.01555	1.55811
	2.37016	2.07024	1.88434
	2.3534	2.42678	2.11442
	4.71902	1.83105	1.48883
	4.22488	1.84403	1.6448
	2.03596	1.70209	1.47817
	3.92847	1.44818	2.02523
	3.95307	2.27728	2.04069
	1.93774	2.23981	1.29597
	1.80133	1.42085	1.79161
	1.87472	1.47577	1.65238
	1.98274	1.90226	1.42988
	1.99094	1.40645	2.51417
	1.89237	1.90125	1.79052
	1.74753	1.74356	2.75524
	1.73048	1.15674	2.11934
	3.14141	1.40912	1.58354
	1.94538	1.76959	2.28475
	2.97569	1.72472	2.21847
	1.91045	2.11126	1.47685
	2.35131	1.92575	1.81447
	2.04588	1.96906	1.19068
	2.25523	1.48432	1.28444
	2.22347	1.73466	2.2372
	2.22364	2.43933	1.58601
	2.2973	1.30485	2.27245
	2.43194	1.70486	2.25039
	3.00006	1.55586	1.84849
	2.32535	2.09085	2.55973
	2.478	1.45398	1.29056
	1.99007	1.43557	1.26277
	1.90555	1.81198	1.15232
	2.9312	1.62445	1.27103
	2.53841	2.25028	1.35412
	1.9842	1.93146	2.56161
	1.70245	2.89134	2.05844
	2.93104	1.29555	2.38258
	3.25995	2.1711	1.57637
	1.85485	1.78127	1.78838
	2.75428	1.52869	1.61635
	1.73468	1.86778	2.21546
	2.18391	1.69568	1.13088
	2.2229	1.84401	1.37513
	2.1926	2.30285	1.37857
	2.79479	1.54125	1.43546
	2.67246	1.9442	1.37636
	2.10529	1.71291	1.70356
	2.02237	1.60606	2.63605
	2.59274	1.58198	1.44809
	2.53986	1.58514	1.75148
	2.17756	1.89515	1.7589
	2.97275	1.41477	1.77682
	2.26499	1.65363	1.52852
	2.05833	1.70156	1.43803
	2.47648	1.30711	2.09601
	2.3325	1.43957	1.48133
	3.0306	2.10281	1.1625
	1.97984	1.18652	1.72985
	2.97807	1.85609	1.97741
	2.18229	2.05576	1.68027
	2.44941	1.22383	2.12624
	2.00095	1.53444	1.79783
	2.29159	2.5902	2.07901
	1.82136	1.87824	1.8144
	2.01751	1.54661	2.00557
	2.35577	1.63991	1.37693
	1.89003	1.97877	2.02315
	1.70822	1.60643	1.61222
	1.81262	1.9703	2.04889
	1.78369	1.79363	1.42813
	2.33906	1.40879	2.21654
	3.01205	2.16238	1.85576
	1.93957	1.93074	1.40222
	2.37391	1.57769	1.57012
	2.39819	1.76542	1.2796
	3.20893	1.81735	1.27995
	2.10726	1.46067	1.96306
	2.72695	1.24881	2.68906
	2.90877	1.88735	1.47987
	3.06722	1.35531	1.4784
	2.46056	1.98457	2.08848
	1.78527	1.26105	1.73024
	1.89955	1.54764	1.67962
	1.78173	2.42317	1.72754
	2.07099	1.44719	1.16349
	2.52217	1.56825	1.43194
	2.25181	1.87677	2.23022
	2.83824	1.38164	2.11673
	2.59942	1.65367	1.27533
	2.05173	1.13405	2.04973
	2.07585	2.18705	1.8523
	3.28927	2.24678	1.74196
	2.72178	2.02806	1.66825
	3.29964	1.70149	2.13365
	2.36771	1.45415	1.72986
	2.75417	1.38465	1.56395
	2.46312	1.75909	1.79064
	2.98517	2.45134	1.62895
	2.60078	1.94308	2.20014
	2.19873	1.46885	1.79274
	3.13834	1.42429	1.74042
	2.18095	1.30169	1.99942
	2.39618	1.57076	1.55968
	2.62376	2.04044	1.30301
	2.40251	1.15967	1.72743
	2.63565	1.83901	1.39323
	1.78547	1.5235	1.87148
	2.08966	2.73843	2.13077
	2.59708	2.1497	1.4039
	2.26438	2.06553	1.80044
	2.89128	1.59077	1.48849
	3.11686	2.13916	1.48863
	3.01077	2.49553	1.65703
	1.85064	1.71158	2.08381
	2.18842	2.06888	1.34678
	2.41944	2.0317	2.54927
	1.64555	2.08855	1.85591
	2.11584	1.18679	1.5217
	2.25151	1.64891	1.3161
	2.3876	1.44157	1.8897
	2.24271	1.76076	1.57414
	2.82787	2.28595	1.64719
	2.69775	1.21196	1.354
	2.29794	2.09201	1.70753
	3.06868	1.52671	2.39744
	2.51406	1.90672	1.68968
	3.06868	1.74303	1.49309
	2.84553	1.92249	1.8847
	2.24344	2.05021	1.31977
	3.1015	1.34039	1.79646
	2.19719	1.39679	2.2556
	1.94612	1.54493	2.27017
	2.55307	2.24848	1.5155
	2.52525	1.91923	2.43165
	2.74662	1.61225	2.24511
	2.48501	2.00622	1.31496
	2.53908	1.92961	1.78116
	2.82339	2.15562	1.59025
	2.81996	1.38745	1.63302
	2.88087	2.0296	2.75662
	2.33068	2.22288	1.68769
	2.27012	1.42629	1.60205
	3.07814	1.75528	1.86265
	2.94756	1.73967	1.75817
	2.07415	1.97124	1.48202
	2.29823	1.5631	2.10489
	2.85795	1.47882	1.35606
	2.95475	1.37002	1.98666
	2.52903	1.93601	2.49645
	2.40073	1.36768	1.34679
	2.31803	1.24332	2.036
	3.15002	1.58145	1.84326
	2.48787	1.28489	2.1277
	1.96987	1.23607	1.86273
	2.47962	2.60734	1.73463
	2.0856	1.58512	1.97263
	1.61755	2.04505	1.64747
	3.05694	2.33104	1.33208
	1.58442	1.62703	1.71764
	3.20486	1.6932	1.37227
	2.9363	1.93233	1.61545
	2.84947	1.54064	1.47012
	2.77239	1.41133	1.24251
	2.2735	1.32128	1.55572
	2.11363	1.93978	2.75593
	1.97034	1.27484	1.33026
	2.53474	1.52781	1.8019
	2.08187	2.30389	2.57857
	1.85863	1.73097	1.59122
	2.87447	1.3514	1.4908
	2.06191	1.64497	2.11812
	2.59273	2.03633	1.38247
	1.79854	2.09485	1.5371
	1.54245	1.41761	1.3966
	2.70491	1.71831	1.30618
	2.17117	1.68933	1.66318
	1.8638	1.52523	1.2435
	2.00807	1.99559	1.34949
	2.81321	2.05003	2.06224
	2.08959	1.88265	1.51328
	2.86084	1.29821	1.69984
	1.56324	1.86878	1.42852
	2.25782	1.73944	1.74747
	2.32429	1.60389	2.33756
	2.78576	2.21121	1.6936
	1.92972	1.56676	1.54157
	2.44075	1.90651	1.68906
	2.9282	2.56265	1.76465
	2.09994	1.33263	2.30513
	2.04403	2.14392	1.64706
	1.81305	1.74532	2.12359
	3.60151	2.08537	1.59202
	1.6935	1.90869	1.97693
	4.065	1.25757	1.30945
	3.77558	1.72778	1.60036
	3.92509	1.29209	1.32142
	3.40288	1.48106	1.74373
	1.67859	1.16088	2.11956
	3.5419	1.95875	1.89695
	3.70751	1.76986	1.46722
	3.677	1.38984	1.45248
	4.93292	2.01728	1.36572
	3.46747	1.48737	1.8734
	3.86996	1.46941	2.16426
	4.05033	1.4794	1.89148
	2.0103	1.93743	1.62589
	1.79835	1.56312	1.80973
	3.60603	1.78101	1.42533
	3.78399	2.19172	2.04637
	3.49653	1.45632	1.46819
	3.43207	1.95474	1.44295
	3.79561	1.76685	2.337
	3.61116	1.69778	1.62107
	2.99853	2.41636	2.81098
	3.20907	1.46534	1.40309
	2.01451	1.48049	1.70169
	2.04031	2.74094	1.20277
	2.58563	1.29401	1.48198
	4.79658	1.74937	1.66556
	4.59101	1.06197	1.77757
	4.13882	2.86331	1.49464
	3.62105	2.04103	2.00654
	3.96841	1.3149	1.61763
	1.88047	1.27454	2.00203
	4.09536	1.3187	1.82239
	3.62558	2.05432	1.22624
	1.90476	2.20506	1.28684
	3.73259	1.65682	1.77324
	3.59449	1.31253	1.51575
	4.38755	1.85208	1.11617
	3.88403	1.48172	2.17527
	3.76149	1.28972	1.88018
	4.14099	1.70009	1.82396
	3.89158	1.63644	1.36618
	3.92244	1.2698	1.57936
	3.64867	1.81236	1.74512
	1.73138	2.03343	2.23123
	2.03094	1.6111	1.83256
	1.69304	2.0545	2.04219
	1.63369	2.25934	1.68431
	1.90649	1.8528	2.01907
	1.58779	1.86855	1.89032
	1.83958	2.07121	1.04518
	2.69336	2.17929	1.95234
	3.0811	1.566	1.57244
	3.02056	1.27649	1.71501
	2.4214	2.13263	2.44568
	2.66541	2.19756	1.67244
	2.52824	1.7659	1.56874
	2.38418	2.19244	1.27027
	2.76587	2.23874	2.07884
	1.84661	1.59215	2.05297
	2.43316	1.20545	1.08605
	1.74405	1.51846	1.79029
	2.14869	1.7693	2.12739
	2.39719	1.80837	1.91736
	2.41006	1.7983	2.07335
	2.23798	2.10326	1.54893
	3.24628	1.32474	1.86558
	1.92313	1.20604	2.0316
	1.57857	1.71223	1.88803
	2.51885	1.45158	1.98631
	2.70632	2.24761	1.49889
	3.25563	1.86986	1.49152
	3.11921	1.16492	1.35651
	2.20959	1.23088	1.29713
	2.6939	1.65959	2.00083
	2.57487	1.20034	1.76042
	3.21001	1.53034	2.23164
	3.06837	1.88973	1.35073
	2.34378	2.30892	1.34202
	2.34903	2.11515	1.84777
	2.24545	1.25662	1.53951
	2.86092	1.68285	2.97686
	1.86135	2.73611	1.32954
	2.51654	1.94929	1.46576
	3.16988	1.28114	2.33086
	1.66136	2.27006	1.68441
	2.50921	1.11469	1.65531
	2.14338	1.33079	2.25336
	1.75346	1.33656	1.48149
	2.74724	1.89481	1.36353
	3.29083	2.10209	1.64282
	2.55328	2.1868	1.34995
	2.61838	1.64879	1.73088
	2.87258	1.92697	1.40688
	2.36455	1.56931	1.7365
	1.77716	1.31515	1.97081
	2.47552	1.56406	1.75524
	2.56705	1.34113	1.28203
	1.85554	1.85542	1.82459
	1.95783	1.21695	1.63855
	2.94974	1.59614	2.25002
	2.09863	1.84638	1.38862
	2.24174	1.51631	1.49521
	2.14861	1.9149	1.53946
	2.07106	1.53369	2.44841
	2.0957	1.68234	1.36553
	2.50017	1.85257	1.67304
	2.07011	1.48457	2.19788
	2.53955	1.93771	1.48473
	1.72619	2.28212	1.91822
	2.01983	1.39481	2.09963
	2.13415	1.93622	1.59472
	2.52564	1.8465	1.86572
	2.59352	2.10608	2.69131
	1.79021	1.38945	1.98065
	2.18106	1.46143	1.8987
	2.55236	2.02557	2.3481
	2.5926	1.2667	2.52949
	2.11839	2.19623	1.20455
	2.37671	1.09273	1.39077
	2.87706	2.2928	1.67154
	2.98146	2.63448	2.00481
	2.70907	1.53991	2.57695
	2.84011	2.06346	2.30649
	2.7598	1.44911	1.71944
	2.66123	1.70373	1.22743
	2.55258	1.98937	2.43551
	2.7586	2.39534	1.39942
	2.29583	2.07941	1.86097
	2.31969	1.18125	1.80216
	1.54456	2.07155	1.34107
	3.04046	1.93692	1.66546
	2.71624	1.45191	1.91894
	2.19133	2.01184	1.51296
	2.80297	1.5214	2.19775
	2.85295	1.50157	2.88628
	2.17912	1.88828	1.56255
	2.79355	1.10825	3.04464
	3.0105	1.73392	1.58038
	2.73623	1.85506	1.1005
	2.96581	1.46857	1.47406
	3.11535	1.61853	1.58237
	2.40252	2.81997	1.5771
	2.16209	1.73831	2.27522
	2.7189	1.78713	1.89247
	2.09999	2.22501	1.11245
	3.0758	2.20642	1.43347
	2.88592	1.51875	1.33006
	2.65588	1.86455	1.3079
	2.85755	1.44769	1.63593
	2.42187	1.01808	1.28403
	2.2224	1.15506	1.53655
	2.81867	2.77145	1.55384
	2.89264	1.73833	2.44275
	2.00094	1.80412	2.3863
	2.99401	2.38507	1.12423
	3.16465	2.01525	1.25944
	2.06503	1.82473	2.12529
	2.21131	2.01212	2.0142
	2.4881	2.28501	1.2096
	2.26338	1.92591	1.77682
	3.25046	2.20052	1.72389
	2.8281	2.01331	2.16988
	2.44836	1.95536	1.50737
	2.61554	1.67621	1.69643
	1.94444	1.44068	2.27183
	2.52384	1.24365	1.3711
	2.96618	1.4757	1.61987
	2.48324	2.44208	1.56709
	2.58372	2.38785	1.81201
	2.51227	1.57921	1.93959
	2.04822	1.98493	2.5049
	1.92302	1.38693	2.1811
	2.05669	1.3444	1.21947
	2.12973	1.6639	1.65684
	2.79281	2.17844	1.5125
	2.39345	1.40071	2.99897
	1.78032	1.98969	1.61173
	2.21547	1.77761	8.94828
	2.79849	1.48953
	1.84016	2.44828
	3.20944	2.03873
	3.20473	1.90801
	2.03593	2.17367
	3.13745	1.99273
	2.49402	1.86481
	1.93454	2.02807
	2.12335	1.67485
	3.23696	1.33627
	2.09095	1.98762
	2.39396	1.68355
	2.61835	1.98704
	2.46638	1.59293
	2.33892	1.94309
	3.26089	1.62561
	1.98841	1.18469
	2.38641	1.76153
	2.47987	1.68612
	2.44088	1.44322
	2.06402	1.91203
	2.07892	1.57154
	2.40593	1.98414
	2.80041	2.08075
	2.00229	1.37313
	2.65829	1.63444
	2.10058	1.69074
	3.1888	1.81431
	2.32305	2.15863
	1.92992	3.24387
	2.47955	2.35761
	2.36535	1.84288
	2.6024	1.84405
	3.18829	1.62982
	2.90565	1.62207
	2.40498	1.62162
	2.5244	1.20038
	2.11046	1.83791
	2.1754	1.39271
	2.48596	1.14037
	2.41392	1.98207
	2.91339	1.77829
	1.66847	1.93018
	2.58718	1.96263
	2.1	3.18418
	1.90559	2.38395
	2.17947	1.70986
	2.84381	1.80191
	2.00741	1.74963
	1.62205	1.96473
	2.23097	1.2701
	2.03491	2.40039
	2.53184	1.82761
	1.30616	1.65253
	1.82614	1.42429
	0.945242	2.27554
	2.48319	1.7775
	1.6877	1.57695
	2.42397	1.64624
	2.28748	2.23966
	1.87742	1.12928
	2.93849	2.28287
	2.64624	2.13557
	2.27853	2.3508
	2.19616	1.79439
	3.91157	1.72499
	3.51019	1.13324
	3.3738	2.05826
	3.97402	1.69273
	3.40011	2.01944
	2.03512	1.72071
	3.80928	1.62711
	1.80967	1.49235
	3.56845	1.9542
	3.8571	1.33944
	4.07484	1.35958
	2.05559	2.11371
	3.68453	1.73021
	3.47092	2.25263
	3.79116	1.44062
	3.53251	1.42793
	3.84991	1.62876
	3.89205	1.77737
	1.85465	1.49921
	4.12403	2.21034
	3.84572	1.28874
	3.99821	1.74981
	3.66902	1.1617
	2.15163	1.76523
	2.13635	2.13539
	3.40326	2.40333
	3.62433	1.98087
	3.20256	1.39175
	2.85619	1.89386
	2.78272	2.07644
	3.21809	1.98559
	3.94198	2.09998
	3.40538	1.62985
	3.61143	1.90558
	3.8417	2.23065
	1.73708	1.36631
	1.62714	1.57175
	3.7375	1.42142
	3.61132	1.46919
	3.37246	1.68915
	3.89553	1.35162
	3.70423	1.95608
	2.19745	2.30213
	1.79287	1.71307
	1.79413	1.35988
	1.74597	1.57934
	2.26141	2.16057
	2.29238	1.54659
	2.11484	1.6303
	2.63079	1.24164
	3.02419	1.83432
	2.5647	1.54207
	2.45918	1.52163
	1.69097	1.54128
	2.3052	1.89871
	2.88167	2.52738
	2.61077	3.05779
	2.9109	1.82744
	2.24278	1.42649
	2.17644	1.5785
	2.71555	1.70835
	2.85969	2.29632
	2.35931	1.90983
	2.69077	1.17369
	2.16555	1.48943
	3.23757	1.59804
	2.58605	1.82936
	3.13559	2.22031
	2.20709	1.56311
	2.8129	1.46112
	2.76208	1.89408
	2.64391	2.06186
	1.91812	1.8638
	2.7205	1.83539
	1.99845	1.93793
	3.1624	1.84864
	3.20825	1.66333
	2.2278	1.4093
	2.41109	1.46741
	2.66564	1.67485
	3.16427	2.2256
	3.25761	2.51529
	2.50795	1.57403
	3.12595	1.3023
	2.49125	2.26726
	2.2868	1.40699
	1.86743	2.8495
	2.6507	1.59341
	2.8177	1.42225
	1.79995	1.37933
	1.9056	1.64037
	2.15766	1.59534
	2.1344	1.49133
	3.33335	1.98666
	2.23871	2.05021
	2.53487	1.40543
	2.35537	2.09871
	2.53518	1.94959
	3.05007	1.87093
	1.95826	1.35062
	2.50884	1.64648
	2.41279	1.89314
	2.91363	1.88847
	2.39951	1.82724
	2.46903	2.23725
	2.19859	3.1257
	3.08835	1.91653
	2.98046	1.55279
	2.5591	1.91827
	2.1336	1.29188
	2.46426	1.91197
	2.78382	2.00829
	1.91533	1.62151
	2.49444	1.44039
	2.86806	1.96893
	2.68313	1.71427
	2.39229	2.29609
	2.83254	1.85781
	1.99483	2.19495
	2.37946	1.72975
	2.76352	1.34205
	2.73801	1.73099
	2.45473	2.44276
	2.63715	1.97456
	2.61395	1.84227
	2.53543	1.83954
	1.90763	1.22354
	3.1979	1.63537
	2.27356	1.56279
	2.3341	1.1365
	1.90496	1.45268
	3.04099	1.621
	2.25331	2.15288
	2.43751	2.22888
	2.12047	2.0409
	2.25797	1.53079
	2.23005	1.66866
	2.82946	1.40726
	3.13673	2.04318
	2.38646	1.15054
	2.84061	2.20535
	3.10296	1.52093
	2.4769	1.32518
	2.62041	1.39162
	2.48383	2.622
	2.07202	1.46681
	2.94396	1.67825
	1.98854	2.13974
	2.34641	1.98676
	2.18535	1.51337
	3.18257	1.30931
	2.2464	1.60387
	2.59533	1.5216
	2.75872	1.89214
	1.98684	1.55752
	3.11352	1.61466
	1.93732	1.2772
	3.08871	1.51284
	1.90895	1.5618
	2.02742	2.24928
	2.47968	1.85664
	2.58913	1.42004
	2.49573	2.25796
	2.3954	2.63864
	2.77948	1.3935
	3.19694	1.54876
	2.63467	2.04731
	3.17951	1.96972
	2.52355	1.59972
	2.47896	1.28655
	3.4884	2.1735
	3.77114	1.58615
	3.75686	1.66052
	3.74667	1.63444
	3.49239	1.44631
	3.77819	1.81952
	3.38329	2.54014
	3.43161	1.55477
	4.45176	1.74785
	3.65482	2.01412
	3.5599	1.27943
	3.78604	2.21137
	1.99634	1.80464
	3.45478	1.81851
	4.3912	1.41759
	3.49624	1.77707
	3.35218	1.47858
	3.58478	1.7294
	3.53356	1.35569
	3.46191	1.31972
	3.43398	1.7649
	3.74353	1.48401
	3.92607	1.49896
	3.97237	1.45953
	3.71589	1.53753
	3.88564	2.02304
	3.49125	1.62526
	3.94505	1.24598
	3.09587	1.62966
	3.09646	1.587
	1.80377	2.17228
	4.1147	2.12515
	3.81786	1.63927
	3.57841	1.54336
	3.78216	2.35084
	4.42	1.65576
	1.71642	1.52236
	2.03006	2.03604
	1.55671	1.76874
	3.48057	1.51074
	1.77877	1.67934
	1.67721	2.21441
	2.00218	2.4864
	1.86322	2.37429
	1.8397	1.9447
	2.53916	1.2686
	2.30764	1.70889
	2.31084	1.55532
	3.07794	2.10379
	2.95466	1.7428
	2.72194	2.01936
	2.38063	1.29146
	2.29321	1.58341
	2.35198	1.82769
	2.27194	1.26353
	2.34018	2.17788
	3.00045	1.83001
	2.66467	2.07027
	2.11547	2.42039
	2.62156	1.53615
	2.79175	1.71431
	3.26758	1.64005
	2.28778	1.88043
	1.98086	1.71196
	2.26653	1.364
	2.72199	1.69581
	2.10737	2.31729
	2.74271	1.65082
	2.40302	1.7654
	2.26077	1.38198
	2.6683	1.70333
	2.55229	2.28813
	2.43595	1.80329
	1.87946	1.26227
	2.25629	1.88163
	2.9782	2.06177
	1.98318	1.46816
	1.99134	1.93921
	2.25267	2.18436
	2.91721	1.67996
	2.00555	1.92166
	1.71062	2.00648
	2.29154	1.22342
	1.61093	1.42207
	2.28428	1.95392
	2.74409	1.47889
	1.85285	3.00716
	2.1418	1.76593
	2.5632	1.17011
	2.4847	1.36885
	1.58572	1.31482
	1.97359	1.75207
	2.4533	1.82627
	3.27668	1.45244
	2.78419	1.91322
	3.20097	1.46537
	2.62312	1.33571
	1.78988	1.96969
	1.80699	2.53815
	2.42843	2.46447
	2.31043	2.1628
	2.87583	1.61501
	2.79426	1.9153
	2.43309	1.65062
	3.12679	1.49372
	2.6248	2.24539
	2.58919	2.14073
	2.84717	1.59057
	3.03931	1.42524
	2.50686	1.25035
	2.63493	2.3118
	2.37912	1.92706
	2.63029	1.98846
	2.86179	1.18493
	2.44815	2.36594
	2.33575	2.0037
	2.25017	1.95159
	2.21129	1.46568
	2.61946	1.62446
	3.07622	1.76016
	2.7282	1.51637
	2.59278	2.39127
	2.39094	1.59939
	2.19291	1.11536
	2.07451	1.80661
	1.72934	1.21961
	3.11693	1.70883
	2.22351	1.73158
	2.71335	1.53986
	2.61466	1.57829
	3.28466	1.88598
	2.82687	1.39441
	3.31226	1.2728
	3.11731	1.97375
	2.68674	1.54348
	1.68389	1.45808
	3.30783	1.69984
	2.76309	2.29072
	1.70428	1.49269
	2.87975	1.13436
	2.72987	2.68902
	1.74014	1.39059
	3.12043	1.91813
	3.08288	1.30519
	2.17265	2.22802
	2.30372	2.28532
	3.19087	1.63522
	2.35931	2.68417
	2.12069	2.02551
	2.49539	1.30008
	3.19384	1.45102
	2.75258	1.42929
	2.79289	2.20911
	3.11288	1.82831
	2.0362	1.75434
	2.15871	2.02552
	2.25258	1.68723
	2.7999	2.0015
	2.13132	1.85181
	2.43857	1.69134
	2.11202	1.74211
	2.26089	1.38276
	2.69387	1.40785
	2.68226	2.38697
	2.78411	1.39214
	2.39896	2.12354
	2.01865	2.04178
	1.03065	1.52681
	2.00241	1.43021
	1.93527	2.30596
	2.27067	2.16231
	2.5011	1.19058
	2.51691	2.48994
	1.89799	1.25316
	1.67251	2.25041
	2.58181	2.10262
	2.13277	1.84813
	2.45439	1.90926
	3.1005	2.00395
	2.74023	1.67469
	2.22129	1.2895
	1.90095	2.17637
	1.87847	1.70881
	2.69823	1.35694
	1.88627	1.60205
	2.16953	1.7616
	2.23747	1.21479
	3.09789	1.99367
	2.1912	2.70532
	2.29086	2.06712
	3.10552	1.48379
	2.09498	2.29395
	1.82019	1.50578
	2.3096	1.71977
	2.45538	1.48404
	2.27344	1.36519
	1.83861	1.73493
	2.40344	1.64606
	2.20538	1.9656
	2.17374	2.18298
	1.56823	2.13636
	2.2482	1.97549
	2.04253	2.49251
	2.93333	2.35138
	2.54415	1.35859
	1.89982	1.6914
	2.68113	1.34919
	3.18433	1.65068
	2.60908	1.76261
	2.19678	1.48113
	2.27988	1.98715
	2.56725	1.58316
	2.11296	1.58873
	3.19422	1.62204
	2.46114	2.23642
	2.01605	1.27469
	3.11241	2.24961
	3.2283	1.25044
	2.01491	1.6376
	2.18837	1.83842
	2.47274	1.75428
	2.10696	1.85657
	3.19839	1.59038
	2.27678	2.04462
	3.12002	2.38331
	2.19152	1.55169
	1.37916	1.53781
	1.73402	1.18141
	2.33193	1.51498
	2.05879	2.15795
	2.61696	2.11148
	2.24382	1.61786
	3.23276	1.74346
	2.05897	1.49744
	2.38013	1.54623
	2.78179	2.32147
	2.03495	1.81442
	2.23797	1.91491
	2.71326	1.68786
	3.1432	1.50536
	2.37053	1.2943
	2.59628	1.89073
	2.60596	1.28863
[truncated: 1,167 more rows]

## Sheet: Fig 5AB
	mean log GFP fluorescence	CV of log GFP fluorescence	SCV of log GFP fluorescence	normalized mean log GFP fluorescence			pairwise comparisons: NN206 (grcA(wt) reporter) vs NN212 (grcA(ATA) reporter)							median log GFP fluorescence	mean log GFP fluorescence	standard deviation of log GFP fluorescence	Skewness = 3*(Mean – Median)/SD					pairwise comparisons: NN206 (grcA(wt) reporter) vs NN212 (grcA(ATA) reporter)					Additional		mean log GFP fluorescence	CV of log GFP fluorescence	SCV of log GFP fluorescence	normalized mean log GFP fluorescence			pairwise comparisons: NN206 (grcA(wt) reporter) vs NN212 (grcA(ATA) reporter)							median log GFP fluorescence	mean log GFP fluorescence	standard deviation of log GFP fluorescence	Skewness = 3*(Mean – Median)/SD		pairwise comparisons: NN206 (grcA(wt) reporter) vs NN212 (grcA(ATA) reporter)
SAMPLE.ID	MEAN.log.GFP	CV.log.GFP	SCV.log.GFP	norm.MEAN.log.GFP	dataset 141209		per each measurement					compute	SAMPLE.ID	MEDIAN.log.GFP	MEAN.log.GFP	st.dev.log.GFP	Skewness	Kurtosis in R				per each measurement					experiment	SAMPLE.ID	MEAN.log.GFP	CV.log.GFP	SCV.log.GFP	norm.MEAN.log.GFP	dataset 141216		per each measurement					compute	SAMPLE.ID	MEDIAN.log.GFP	MEAN.log.GFP	st.dev.log.GFP	Skewness		per each measurement
206_exp_1.fcs	1.68343	0.197483	0.0389996	1			t-test	p-values				skewness	206_exp_1.fcs	1.73998	1.68343	0.332448	-0.510339	11.8305				t-test	p-values					206_exp_1_ssc	1.60051	0.196898	0.0387688	1			t-test	p-values				skewness	206_exp_1_ssc	1.66178	1.60051	0.315137	-0.583287		t-test	p-values
206_exp_2.fcs	1.58552	0.194255	0.0377351	1				CV.log.GFP	SCV.log.GFP	norm.MEAN.log.GFP		and kurtosis	206_exp_2.fcs	1.64223	1.58552	0.307996	-0.552352	11.3442					Skewness	Kurtosis				206_exp_2_ssc	1.7574	0.192899	0.0372099	1				MEAN.log.GFP	CV.log.GFP	SCV.log.GFP	norm.MEAN.log.GFP		206_exp_2_ssc	1.81036	1.7574	0.339	-0.468688
206_exp_3.fcs	1.69913	0.17992	0.0323712	1									206_exp_3.fcs	1.74389	1.69913	0.305707	-0.439257	14.4016			time point t0	exponential phase	0.206045	0.148659				206_exp_3_ssc	1.68582	0.193293	0.037362	1									206_exp_3_ssc	1.73998	1.68582	0.325857	-0.498624			Skewness
206_t1_H_1.fcs	1.59272	0.166122	0.0275964	0.946115				CV of log GFP fluorescence	SCV of log GFP fluorescence	normalized mean log GFP fluorescence			206_t1_H_1.fcs	1.61486	1.59272	0.264584	-0.25107	10.1626										206_t3_W_1_ssc	2.67172	0.183613	0.0337137	1.66929				mean log GFP fluorescence	CV of log GFP fluorescence	SCV of log GFP fluorescence	normalized mean log GFP fluorescence		206_t3_W_1_ssc	2.70968	2.67172	0.490562	-0.232147	time point t0	exponential phase	0.32374
206_t1_H_2.fcs	1.55215	0.159398	0.0254077	0.978953		time point t1	control	0.0215778	0.0216593	0.0615442			206_t1_H_2.fcs	1.56794	1.55215	0.24741	-0.191429	7.52574			time point t1	control	0.111497	0.0772933				206_t3_W_2_ssc	2.70853	0.181526	0.0329517	1.54121		time point t0	exponential	0.986265	0.0914085	0.0876595	NA		206_t3_W_2_ssc	2.7566	2.70853	0.491668	-0.293312
206_t1_H_3.fcs	1.62476	0.150409	0.0226229	0.956234			stress	0.258556	0.258937	0.119712			206_t1_H_3.fcs	1.63832	1.62476	0.244379	-0.166385	9.95578				stress	0.044436	0.0551664				206_t3_W_3_ssc	2.78706	0.187977	0.0353354	1.65324									206_t3_W_3_ssc	2.85435	2.78706	0.523903	-0.385329	time point t3	recovery	0.0124593
206_t1_n_1.fcs	1.56166	0.176819	0.0312651	0.927666									206_t1_n_1.fcs	1.58749	1.56166	0.276132	-0.280621	8.95404										212_exp_1_ssc	1.67731	0.190384	0.0362462	1		time point t3	recovery	0.612509	0.0480136	0.0558547	0.734092		212_exp_1_ssc	1.73216	1.67731	0.319334	-0.515263
206_t1_n_2.fcs	1.51106	0.185078	0.034254	0.953037		time point t2	control	0.127884	0.148516	0.308853			206_t1_n_2.fcs	1.53666	1.51106	0.279665	-0.274577	7.25035			time point t2	control	0.903348	0.184951				212_exp_2_ssc	1.68138	0.176362	0.0311035	1									212_exp_2_ssc	1.72434	1.68138	0.296531	-0.434656
206_t1_n_3.fcs	1.54944	0.173475	0.0300936	0.911901			stress	0.717716	0.709481	0.190315			206_t1_n_3.fcs	1.56403	1.54944	0.268789	-0.162844	7.18283				stress	0.260991	0.707415				212_exp_3_ssc	1.68239	0.1789	0.032005	1									212_exp_3_ssc	1.72825	1.68239	0.300979	-0.457072
206_t2_H_1.fcs	2.63321	0.125453	0.0157384	1.56419			recovery	0.673238	0.65888	0.804582			206_t2_H_1.fcs	2.66276	2.63321	0.330343	-0.268351	35.0216				recovery	0.232433	0.122348				212_t3_W_1_ssc	2.73088	0.20188	0.0407554	1.62813									212_t3_W_1_ssc	2.84653	2.73088	0.551309	-0.629319
206_t2_H_2.fcs	2.62872	0.13867	0.0192292	1.65795									206_t2_H_2.fcs	2.66667	2.62872	0.364523	-0.312308	29.5825										212_t3_W_2_ssc	2.62627	0.214502	0.0460112	1.56198									212_t3_W_2_ssc	2.74878	2.62627	0.563341	-0.652396
206_t2_H_3.fcs	2.7324	0.119531	0.0142877	1.60812		time point t3	control	0.00529998	0.0057065	0.152448			206_t2_H_3.fcs	2.7566	2.7324	0.326607	-0.222264	38.8225			time point t3	control	0.044285	0.0406836				212_t3_W_3_ssc	2.73013	0.196996	0.0388076	1.62277									212_t3_W_3_ssc	2.83871	2.73013	0.537827	-0.605635
206_t2_n_1.fcs	2.64929	0.167333	0.0280003	1.57375			stress	0.365791	0.364611	0.413778			206_t2_n_1.fcs	2.70968	2.64929	0.443313	-0.408654	19.659				stress	0.111515	0.373501
206_t2_n_2.fcs	2.58941	0.146357	0.0214203	1.63316			recovery	0.0345181	0.0407386	0.997191			206_t2_n_2.fcs	2.62757	2.58941	0.378977	-0.302068	24.8595				recovery	0.00303272	0.000982309
206_t2_n_3.fcs	2.50721	0.126852	0.0160915	1.47558									206_t2_n_3.fcs	2.5259	2.50721	0.318045	-0.176376	32.2019										strains NN206 and NN212
206_t2_W_1.fcs	2.79494	0.120582	0.0145399	1.66027									206_t2_W_1.fcs	2.82307	2.79494	0.337019	-0.250374	40.5163										measured in the exponential phase, and time point t3
206_t2_W_2.fcs	2.79766	0.100858	0.0101723	1.7645									206_t2_W_2.fcs	2.80743	2.79766	0.282166	-0.103894	50.7051										N= 3 replicates
206_t2_W_3.fcs	2.79633	0.109904	0.0120789	1.64574									206_t2_W_3.fcs	2.81916	2.79633	0.307328	-0.222849	48.5489										w - cultures initially stressed, but then washed and allowed for recovery
206_t3_H_1.fcs	2.48353	0.146738	0.0215319	1.47528									206_t3_H_1.fcs	2.51808	2.48353	0.364427	-0.284469	24.5729
206_t3_H_2.fcs	2.47305	0.183082	0.0335189	1.55977									206_t3_H_2.fcs	2.51808	2.47305	0.45277	-0.298398	15.6208
206_t3_H_3.fcs	2.49896	0.163638	0.0267773	1.47073									206_t3_H_3.fcs	2.54936	2.49896	0.408924	-0.369763	19.6044											exponential phase	17 h after recovery from 3 hours of ectopic mazF expression
206_t3_n_1.fcs	2.41125	0.194586	0.0378638	1.43234									206_t3_n_1.fcs	2.45161	2.41125	0.469196	-0.258101	12.2831
206_t3_n_2.fcs	2.34055	0.207279	0.0429645	1.4762									206_t3_n_2.fcs	2.39296	2.34055	0.485146	-0.324096	10.7295
206_t3_n_3.fcs	2.26825	0.190975	0.0364713	1.33495									206_t3_n_3.fcs	2.30694	2.26825	0.433178	-0.267957	12.5825	Skewness - average value	Kurtosis - average value
206_t3_W_1.fcs	2.62474	0.135159	0.0182681	1.55917									206_t3_W_1.fcs	2.62757	2.62474	0.354759	-0.0238755	25.2007	0.0233061	26.4983												NN206
206_t3_W_2.fcs	2.60486	0.122612	0.0150336	1.6429									206_t3_W_2.fcs	2.6002	2.60486	0.319386	0.0437897	29.1467														grcA(wt)
206_t3_W_3.fcs	2.59019	0.13044	0.0170147	1.52442									206_t3_W_3.fcs	2.58456	2.59019	0.337865	0.0500042	25.1476
212_exp_1.fcs	1.75375	0.181938	0.0331014	1									212_exp_1.fcs	1.80254	1.75375	0.319073	-0.458778	14.3499
212_exp_2.fcs	1.66188	0.17855	0.03188	1									212_exp_2.fcs	1.70479	1.66188	0.296727	-0.433871	13.8939														NN212
212_exp_3.fcs	1.66833	0.16887	0.0285171	1									212_exp_3.fcs	1.7087	1.66833	0.281731	-0.429869	15.5265														grcA(ATA)
212_t1_H_1.fcs	1.61126	0.156709	0.0245576	0.918754									212_t1_H_1.fcs	1.63832	1.61126	0.252499	-0.321473	12.977
212_t1_H_2.fcs	1.56123	0.145155	0.02107	0.939439									212_t1_H_2.fcs	1.58358	1.56123	0.226621	-0.295824	11.2896
212_t1_H_3.fcs	1.57949	0.151449	0.0229368	0.946747									212_t1_H_3.fcs	1.60313	1.57949	0.239211	-0.296494	12.0443
212_t1_n_1.fcs	1.48974	0.15594	0.0243172	0.849464									212_t1_n_1.fcs	1.51711	1.48974	0.23231	-0.353347	10.0656
212_t1_n_2.fcs	1.44543	0.167185	0.0279508	0.869756									212_t1_n_2.fcs	1.4741	1.44543	0.241654	-0.355912	8.74892
212_t1_n_3.fcs	1.51325	0.155663	0.0242308	0.907043									212_t1_n_3.fcs	1.53666	1.51325	0.235556	-0.298144	9.77826
212_t2_H_1.fcs	2.77404	0.129463	0.0167606	1.58178									212_t2_H_1.fcs	2.81134	2.77404	0.359135	-0.311547	35.6621
212_t2_H_2.fcs	2.52907	0.119822	0.0143574	1.52182									212_t2_H_2.fcs	2.55718	2.52907	0.303039	-0.27829	37.5165
212_t2_H_3.fcs	2.61603	0.14529	0.021109	1.56805									212_t2_H_3.fcs	2.67058	2.61603	0.380082	-0.430517	24.1736
212_t2_n_1.fcs	2.18613	0.124147	0.0154124	1.24655									212_t2_n_1.fcs	2.2131	2.18613	0.271401	-0.298087	26.5248
212_t2_n_2.fcs	2.35735	0.110254	0.0121559	1.41849									212_t2_n_2.fcs	2.37732	2.35735	0.259906	-0.230539	40.6835
212_t2_n_3.fcs	2.66979	0.122794	0.0150783	1.60027									212_t2_n_3.fcs	2.70577	2.66979	0.327833	-0.329262	36.1986
212_t2_W_1.fcs	2.86131	0.11384	0.0129597	1.63154									212_t2_W_1.fcs	2.89736	2.86131	0.325733	-0.332053	49.6009
212_t2_W_2.fcs	2.86935	0.106064	0.0112496	1.72657									212_t2_W_2.fcs	2.89736	2.86935	0.304336	-0.276094	56.7976
212_t2_W_3.fcs	2.79511	0.102234	0.0104518	1.67539									212_t2_W_3.fcs	2.81525	2.79511	0.285755	-0.211478	56.6899
212_t3_H_1.fcs	2.65534	0.140923	0.0198594	1.5141									212_t3_H_1.fcs	2.69795	2.65534	0.3742	-0.341551	28.0924
212_t3_H_2.fcs	2.32809	0.16277	0.0264941	1.40088									212_t3_H_2.fcs	2.38905	2.32809	0.378943	-0.482638	20.3226
212_t3_H_3.fcs	2.45351	0.151259	0.0228792	1.47064									212_t3_H_3.fcs	2.51026	2.45351	0.371115	-0.458796	21.9299
212_t3_n_1.fcs	1.95893	0.167894	0.0281884	1.117									212_t3_n_1.fcs	2.00587	1.95893	0.328892	-0.428136	16.2558
212_t3_n_2.fcs	2.12876	0.152653	0.023303	1.28094									212_t3_n_2.fcs	2.17791	2.12876	0.324962	-0.45376	21.6779
212_t3_n_3.fcs	2.28321	0.15105	0.0228161	1.36856									212_t3_n_3.fcs	2.32258	2.28321	0.344879	-0.342485	17.8129	Skewness - average value	Kurtosis - average value
212_t3_W_1.fcs	2.67756	0.110247	0.0121545	1.52677									212_t3_W_1.fcs	2.69795	2.67756	0.295194	-0.207152	43.7558	-0.227323	42.3733
212_t3_W_2.fcs	2.73913	0.112946	0.0127567	1.64822									212_t3_W_2.fcs	2.76442	2.73913	0.309373	-0.245209	42.8331
212_t3_W_3.fcs	2.58938	0.113755	0.0129403	1.55208									212_t3_W_3.fcs	2.61193	2.58938	0.294556	-0.229608	40.531
strains NN206 and NN212
measured in the exponential phase, and time points t1, t2 and t3
N= 3 replicates
n - uninduced cultures, controls
H - induced or under stress
w - cultures initially stressed, but then washed and allowed for recovery

## Sheet: Fig S1
	mean log GFP fluorescence		pairwise comparisons			ANOVA							Multiple Comparisons
SAMPLE.ID	MEAN.log.GFP	dataset 140918	t-tests	p-values		MEAN.log.GFP_FigS1					p-values		Dependent Variable: MEAN.log.GFP_FigS1
200_exp_1_140918.fcs	1.08196		200 vs 208	0.596939			Sum of Squares	df	Mean Square	F	Sig.		Bonferroni				p-values
200_exp_2_140918.fcs	1.43593		200 vs 211	0.60798		Between Groups	0.033	3	0.011	0.689	0.584		(I) factor	(J) factor	Mean Difference (I-J)	Std. Error	Sig.	95% Confidence Interval
200_exp_3_140918.fcs	1.27886		200 vs 221	0.802111		Within Groups	0.129	8	0.016									Lower Bound	Upper Bound
208_exp_1_140918.fcs	1.21523		208 vs 211	0.27975		Total	0.162	11					1	2	0.0638453	0.103547	1	-0.296381	0.424072
208_exp_2_140918.fcs	1.20234		208 vs 221	0.47891										3	-0.0784079	0.103547	1	-0.438634	0.281819
208_exp_3_140918.fcs	1.18764		211 vs 221	0.383836										4	0.0303917	0.103547	1	-0.329835	0.390618
211_exp_1_140918.fcs	1.24963												2	1	-0.0638453	0.103547	1	-0.424072	0.296381
211_exp_2_140918.fcs	1.24438													3	-0.142253	0.103547	1	-0.50248	0.217973
211_exp_3_140918.fcs	1.53796													4	-0.0334537	0.103547	1	-0.39368	0.326773
221_exp_1_140918.fcs	1.3037												3	1	0.0784079	0.103547	1	-0.281819	0.438634
221_exp_2_140918.fcs	1.23162													2	0.142253	0.103547	1	-0.217973	0.50248
221_exp_3_140918.fcs	1.17026													4	0.1088	0.103547	1	-0.251427	0.469026
													4	1	-0.0303917	0.103547	1	-0.390618	0.329835
strains NN200, NN208, NN211 and NN221														2	0.0334537	0.103547	1	-0.326773	0.39368
measured in the exponential phase														3	-0.1088	0.103547	1	-0.469026	0.251427
N= 3 replicates
flow cytometer Calibur														strains
													factor 1	NN200
													factor 2	NN208
													factor 3	NN211
													factor 4	NN221

## Sheet: Fig S2
	number of analyzed events	mean log GFP fluorescence	number of GFP+ cells	percentage of GFP+ cells	corrected percentage of GFP+ cells
SAMPLE.ID	CELLS	MEAN.log.GFP	num.cells.above.GFPbackground	%.cells.above.GFPbackground	%.corrected_cells.above.GFPbackground	dataset 141209
204_exp.fcs	99998	0.792251	18471	18.4714
204_t1_H.fcs	100000	0.799639	13594	13.594
204_t1_n_1'2.fcs	100000	0.756472	15556	15.556
204_t2_H_1.fcs	100000	0.496134	1227	1.227
204_t2_n_1.fcs	100000	0.517309	1628	1.628
204_t3_H.fcs	99999	0.535441	2180	2.18002
204_t3_n.fcs	100000	0.618042	7242	7.242
209_exp.fcs	99997	0.810543	15021	15.0215	~0
209_t1_H.fcs	100000	0.916168	23755	23.755	10.161
209_t1_n.fcs	100000	0.77141	10761	10.761	~0
209_t2_H.fcs	100000	0.873345	18692	18.692	17.465
209_t2_n.fcs	100000	0.502668	1181	1.181	-0.447
209_t3_H.fcs	100000	1.53479	96294	96.294	94.114
209_t3_n.fcs	100000	0.514538	1778	1.778	~0
			GFPbackground= 1.12
strains NN204 and NN209
measured in the exponential phase, and time points t1, t2 and t3
in Figure S2 shown time points t2 (Figure S2A) and t3 (Figure S2B)

[truncated: 5 more sheets: Fig S3, Fig S4, Sequences, Sequences Supplementary, R commands]
