# Supplementary material for: MazF activation promotes translational heterogeneity of the grcA mRNA in Escherichia coli populations
Source: PeerJ. 2017 Sep 21;5:e3830. doi: 10.7717/peerj.3830 (PMC5610899; doi:10.7717/peerj.3830)
Supplement: Table S1 [file peerj-05-3830-s002.xlsx]

## Sheet: Sheet1
Strain or plasmid name	Relevant characteristics	Source or reference
MG1655	Wild-type E.coli K-12 F-, λ-, ilvG-, rfb-50, rph-1	[Blattner et al. 1997], #103
TOP10	Strain for plasmid propagation	Moll Strain Collection, #497
DH5α	Strain for plasmid propagation	Moll Strain Collection, #423
BW25142	Strain for CRIM plasmid propagation or propagation of R6K gamma origin plasmids in high copy number; F-, Δ(araD-araB)567, ΔlacZ4787(::rrnB-3), Δ(phoB-phoR)580, λ-, galU95, ΔuidA4::pir-116, recA1, endA9(del-ins)::frt, rph-1, Δ(rhaD-rhaB)568, hsdR514	[Haldimann and Wanner 2001], gift from Guet Lab, #1055
BW23473	Strain for CRIM plasmid propagation or propagation of R6K gamma origin plasmids in medium copy number; F-, Δ(argF-lac)169, ΔuidA3::pir+, recA1, rpoS396(Am), endA9(del-ins)::frt, rph-1, hsdR514, rob-1, creC510	[Haldimann and Wanner 2001], gift from Karin Schnetz, #1108
BW27784	used for arabinose-inducible expression; Δ(araD-araB)567, ΔlacZ4787(::rrnB-3), λ-, Δ(araH-araF)570(::frt), ΔaraEp-532::frt, φPcp18araE533, Δ(rhaD-rhaB)568, hsdR514	[Khlebnikov et al. 2000], gift from Guet Lab, #1056
TB205	MG1655 attP21::λPR-mCherry::frt (for constitutive expression of mCherry)	[Bergmiller et al. 2017], #1057
TB212	BW27784 attP21::λPR-mCherry::frt (for constitutive expression of mCherry)	[Bergmiller et al. 2017], #1058
MG1655 ΔmazF	P1-transduced KEIO collection ΔmazF strain into MG1655, and removed Kan-cassette with Flp recombinase	[Müller et al. 2016], #888
NN200-cat	MG1655 attHK022::grcA(wt)-gfpMS:frt-cat	This study, #1077
NN201-cat	BW27784 attHK022::grcA(wt)-gfpMS:frt-cat	This study, #1078
NN202-cat	TB205 attHK022::grcA(wt)-gfpMS:frt-cat	This study, #1079
NN203-cat	TB212 attHK022::grcA(wt)-gfpMS:frt-cat	This study, #1080
NN206-cat	NN201 attλ::PBAD-mazF:frt-cat	This study, #1083
NN207-cat	NN203 attλ::PBAD-mazF:frt-cat	This study, #1084
NN208-cat	ΔmazF MG1655 attHK022::grcA(wt)-gfpMS:frt-cat	This study, #1085
NN211-cat	MG1655 attHK022::grcA(ATA)-gfpMS:frt-cat	This study, #1112
NN212-cat	NN204 attHK022::grcA(ATA)-gfpMS:frt-cat	This study, #1113
NN213-cat	TB205 attHK022::grcA(ATA)-gfpMS:frt-cat	This study, #1114
NN214-cat	NN205 attHK022::grcA(ATA)-gfpMS:frt-cat	This study, #1115
NN221-cat	ΔmazF MG1655 attHK022::grcA(ATA)-gfpMS:frt-cat	This study, #1143
NN225-cat	MG1655 attHK022::rpsU-gfpMS:frt-cat	This study, #1222
NN227-cat	MG1655 attλ::Pmaz-gfpMS::frt-cat	This study, #1175
NN228-cat	MG1655 attHK022::rpsU(ATA)-gfpMS:frt-cat	This study, #1223
NN229-cat	ΔmazF MG1655 attλ::Pmaz-gfpMS::frt-cat	This study, #1176
NN230-cat	TB205 attλ::Pmaz-gfpMS::frt-cat	This study, #1177
NN231-cat	BW27784 attλ::Pmaz-gfpMS::frt-cat	This study, #1178
NN232-cat	TB212 attλ::Pmaz-gfpMS::frt-cat	This study, #1182
NN234-cat	NN204 attHK022::rpsU-gfpMS:frt-cat	This study, #1225
NN236-cat	NN204 attHK022::rpsU(ATA)-gfpMS:frt-cat	This study, #1227
NN200	MG1655 attHK022::grcA(wt)-gfpMS:frt	This study, #1086
NN201	BW27784 attHK022::grcA(wt)-gfpMS:frt	This study, #1087
NN202	TB205 attHK022::grcA(wt)-gfpMS:frt	This study, #1088
NN203	TB212 attHK022::grcA(wt)-gfpMS:frt	This study, #1089
NN204	BW27784 attλ::PBAD-mazF::frt (sequence PBAD-mazF from the plasmid-based system pBAD-mazF [Amitai et al. 2004])	[Nikolic et al. unpublished], #1090
NN205	TB212 attλ::PBAD-mazF::frt	[Nikolic et al. unpublished], #1091
NN206	NN201 attλ::PBAD-mazF:frt	This study, #1092
NN207	NN203 attλ::PBAD-mazF:frt	This study, #1093
NN208	ΔmazF MG1655 attHK022::grcA(wt)-gfpMS:frt	This study, #1094
NN209	BW27784 attλ::PBAD-gfpMS::frt	[Nikolic et al. unpublished], #1122
NN211	MG1655 attHK022::grcA(ATA)-gfpMS:frt	This study, #1124
NN212	NN204 attHK022::grcA(ATA)-gfpMS:frt	This study, #1125
NN213	TB205 attHK022::grcA(ATA)-gfpMS:frt	This study, #1126
NN214	NN205 attHK022::grcA(ATA)-gfpMS:frt	This study, #1127
NN221	ΔmazF MG1655 attHK022::grcA(ATA)-gfpMS:frt	This study, #1146
NN225	MG1655 attHK022::rpsU-gfpMS:frt	This study, #1228
NN227	MG1655 attλ::Pmaz-gfpMS::frt	This study, #1183
NN228	MG1655 attHK022::rpsU(ATA)-gfpMS:frt	This study, #1229
NN229	ΔmazF MG1655 attλ::Pmaz-gfpMS::frt	This study, #1184
NN230	TB205 attλ::Pmaz-gfpMS::frt	This study, #1185
NN231	BW27784 attλ::Pmaz-gfpMS::frt	This study, #1186
NN232	TB212 attλ::Pmaz-gfpMS::frt	This study, #1187
NN234	NN204 attHK022::rpsU-gfpMS:frt	This study, #1231
NN236	NN204 attHK022::rpsU(ATA)-gfpMS:frt	This study, #1233
pAH68-frt-chlor	pAH68 ∆bla::frt-cat-frt	gift from Tobias Bergmiller, #1065
pAH120-frt-chlor	pAH120 ∆bla::frt-cat-frt	gift from Tobias Bergmiller, #1067
pAH69	helper plasmid for integration in attHK022	[Haldimann and Wanner 2001], gift from Guet Lab, #1066
pINT-ts	helper plasmid for integration in attλ	[Haldimann and Wanner 2001], gift from Guet Lab, #1068
pCP20	AmpR, CamR, yeast Flp recombinase activity; flp, bla, cat, rep101ts	[Cherepanov and Wackernagel 1995], gift from Guet Lab, #1064
pZS*12-GFP	AmpR, SC101* ori	gift from Guet Lab, #1059
pMS2_612	constitutive expression of gfpMS; used to PCR-amplify gfpMS. gfpMS is EmgfpΔACA published in [Oron-Gottesman et al. 2016]	[Sauert 2015], #884
pNN200	CamR, grcA(wt)-gfpMS; backbone CRIM plasmid pAH68-frt-cat, EcoRI/PstI	This study, #1069
pNN211	CamR, grcA(ATA)-gfpMS with 2 mutations ACA -> ATA; backbone CRIM plasmid pAH68-frt-cat, EcoRI/PstI	This study, #1072
pNN224	CamR, promoter-gfpMS, backbone CRIM plasmid pAH120-frt-cat ; use for construction of promoter-gfpMS transcriptional fusions via XhoI/BamHI (XhoI-promoter-BamHI-RBS-gfpMS)	This study, #1163
pNN225	CamR, rpsU-gfpMS; backbone CRIM plasmid pAH68-frt-cat, cloned via EcoRI/PstI	This study, #1164
pNN227	CamR, Pmaz-gfpMS, backbone CRIM plasmid pAH120-frt-cat, promoter sequence cloned into pNN224 via XhoI/BamHI (XhoI-Pmaz-BamHI-RBS-gfpMS)	This study, #1173
pNN228	CamR, rpsU(ATA)-gfpMS; backbone CRIM plasmid pAH68-frt-cat, cloned via EcoRI/PstI	This study, #1174
pNN200-ZS*	AmpR, grcA(wt)-gfpMS; backbone pZS*12-GFP, XhoI/HindIII	This study, #1074
	(gfpMS is EmgfpΔACA made by M. Sauert, published in [Oron-Gottesman et al. 2016])	(# is the position in the Moll Strain Collection)
